# Supplementary material
Source: publisher figshare collection journal article supplement (https://acs.figshare.com/ndownloader/files/5698473)
Supplement: Supplementary file 1 [file 5698473]

  
data_ccabs 
  
_audit_creation_method            SHELXL-97 
_chemical_name_systematic 
; 
 ? 
; 
_chemical_name_common             ? 
_chemical_melting_point           ? 
_chemical_formula_moiety          ? 
_chemical_formula_sum 
 'C12 H16 Fe2 N4 O2 S2' 
_chemical_formula_weight          424.11 
  
loop_ 
 _atom_type_symbol 
 _atom_type_description 
 _atom_type_scat_dispersion_real 
 _atom_type_scat_dispersion_imag 
 _atom_type_scat_source 
 'C'  'C'   0.0033   0.0016 
 'International Tables Vol C Tables 4.2.6.8 and 6.1.1.4' 
 'H'  'H'   0.0000   0.0000 
 'International Tables Vol C Tables 4.2.6.8 and 6.1.1.4' 
 'N'  'N'   0.0061   0.0033 
 'International Tables Vol C Tables 4.2.6.8 and 6.1.1.4' 
 'O'  'O'   0.0106   0.0060 
 'International Tables Vol C Tables 4.2.6.8 and 6.1.1.4' 
 'S'  'S'   0.1246   0.1234 
 'International Tables Vol C Tables 4.2.6.8 and 6.1.1.4' 
 'Fe'  'Fe'   0.3463   0.8444 
 'International Tables Vol C Tables 4.2.6.8 and 6.1.1.4' 
  
_symmetry_cell_setting            Monoclinic 
_symmetry_space_group_name_H-M    Cc 
  
loop_ 
 _symmetry_equiv_pos_as_xyz 
 'x, y, z' 
 'x, -y, z+1/2' 
 'x+1/2, y+1/2, z' 
 'x+1/2, -y+1/2, z+1/2' 
  
_cell_length_a                    8.650(2) 
_cell_length_b                    14.336(4) 
_cell_length_c                    14.516(3) 
_cell_angle_alpha                 90.00 
_cell_angle_beta                  97.827(5) 
_cell_angle_gamma                 90.00 
_cell_volume                      1783.3(7) 
_cell_formula_units_Z             4 
_cell_measurement_temperature     193(2) 
_cell_measurement_reflns_used     ? 
_cell_measurement_theta_min       ? 
_cell_measurement_theta_max       ? 
  
_exptl_crystal_description        platy 
_exptl_crystal_colour             red 
_exptl_crystal_size_max           0.2 
_exptl_crystal_size_mid           0.14 
_exptl_crystal_size_min           0.03 
_exptl_crystal_density_meas       ? 
_exptl_crystal_density_diffrn     1.580 
_exptl_crystal_density_method     'not measured' 
_exptl_crystal_F_000              864 
_exptl_absorpt_coefficient_mu     1.870 
_exptl_absorpt_correction_type    none 
_exptl_absorpt_correction_T_min   ? 
_exptl_absorpt_correction_T_max   ? 
_exptl_absorpt_process_details    ? 
  
_exptl_special_details 
; 
 ? 
; 
  
_diffrn_ambient_temperature       193(2) 
_diffrn_radiation_wavelength      0.71073 
_diffrn_radiation_type            MoK\a 
_diffrn_radiation_source          'fine-focus sealed tube' 
_diffrn_radiation_monochromator   graphite 
_diffrn_measurement_device_type   'CCD area detector' 
_diffrn_measurement_method        'phi and omega scans' 
_diffrn_detector_area_resol_mean  ? 
_diffrn_standards_number          ? 
_diffrn_standards_interval_count  ? 
_diffrn_standards_interval_time   ? 
_diffrn_standards_decay_%         ? 
_diffrn_reflns_number             6508 
_diffrn_reflns_av_R_equivalents   0.1002 
_diffrn_reflns_av_sigmaI/netI     0.1299 
_diffrn_reflns_limit_h_min        -10 
_diffrn_reflns_limit_h_max        10 
_diffrn_reflns_limit_k_min        -16 
_diffrn_reflns_limit_k_max        16 
_diffrn_reflns_limit_l_min        -16 
_diffrn_reflns_limit_l_max        17 
_diffrn_reflns_theta_min          2.77 
_diffrn_reflns_theta_max          25.03 
_reflns_number_total              2993 
_reflns_number_gt                 1991 
_reflns_threshold_expression      >2sigma(I) 
  
_computing_data_collection        'Bruker SMART' 
_computing_cell_refinement        'Bruker SMART' 
_computing_data_reduction         'Bruker SHELXTL' 
_computing_structure_solution     'SHELXS-97 (Sheldrick, 1990)' 
_computing_structure_refinement   'SHELXL-97 (Sheldrick, 1997)' 
_computing_molecular_graphics     'Bruker SHELXTL' 
_computing_publication_material   'Bruker SHELXTL' 
  
_refine_special_details 
; 
 Refinement of F^2^ against ALL reflections.  The weighted R-factor wR and 
 goodness of fit S are based on F^2^, conventional R-factors R are based 
 on F, with F set to zero for negative F^2^. The threshold expression of 
 F^2^ > 2sigma(F^2^) is used only for calculating R-factors(gt) etc. and is 
 not relevant to the choice of reflections for refinement.  R-factors based 
 on F^2^ are statistically about twice as large as those based on F, and R- 
 factors based on ALL data will be even larger. 
; 
  
_refine_ls_structure_factor_coef  Fsqd 
_refine_ls_matrix_type            full 
_refine_ls_weighting_scheme       calc 
_refine_ls_weighting_details 
 'calc w=1/[\s^2^(Fo^2^)+(0.0847P)^2^+0.0000P] where P=(Fo^2^+2Fc^2^)/3' 
_atom_sites_solution_primary      direct 
_atom_sites_solution_secondary    difmap 
_atom_sites_solution_hydrogens    geom 
_refine_ls_hydrogen_treatment     mixed 
_refine_ls_extinction_method      none 
_refine_ls_extinction_coef        ? 
_refine_ls_abs_structure_details 
 'Flack H D (1983), Acta Cryst. A39, 876-881' 
_refine_ls_abs_structure_Flack    0.06(5) 
_refine_ls_number_reflns          2993 
_refine_ls_number_parameters      203 
_refine_ls_number_restraints      2 
_refine_ls_R_factor_all           0.1142 
_refine_ls_R_factor_gt            0.0677 
_refine_ls_wR_factor_ref          0.1613 
_refine_ls_wR_factor_gt           0.1433 
_refine_ls_goodness_of_fit_ref    0.968 
_refine_ls_restrained_S_all       0.967 
_refine_ls_shift/su_max           0.000 
_refine_ls_shift/su_mean          0.000 
  
loop_ 
 _atom_site_label 
 _atom_site_type_symbol 
 _atom_site_fract_x 
 _atom_site_fract_y 
 _atom_site_fract_z 
 _atom_site_U_iso_or_equiv 
 _atom_site_adp_type 
 _atom_site_occupancy 
 _atom_site_symmetry_multiplicity 
 _atom_site_calc_flag 
 _atom_site_refinement_flags 
 _atom_site_disorder_assembly 
 _atom_site_disorder_group 
Fe1 Fe 0.42471(15) 0.19169(9) 0.82737(10) 0.0348(4) Uani 1 1 d . . . 
Fe2 Fe 0.66782(16) 0.28746(9) 0.82252(11) 0.0351(4) Uani 1 1 d . . . 
S1 S 0.5802(3) 0.17925(18) 0.7152(2) 0.0357(7) Uani 1 1 d . . . 
S2 S 0.4235(3) 0.34088(18) 0.7788(2) 0.0396(7) Uani 1 1 d . . . 
C1 C 0.4997(13) 0.0781(9) 0.8749(8) 0.046(3) Uani 1 1 d . . . 
N1 N 0.5513(12) 0.0079(7) 0.9042(7) 0.047(3) Uani 1 1 d . . . 
C2 C 0.6086(15) -0.0820(8) 0.9343(9) 0.055(4) Uani 1 1 d . . . 
H2A H 0.5318 -0.1296 0.9112 0.083 Uiso 1 1 calc R . . 
H2B H 0.6265 -0.0838 1.0024 0.083 Uiso 1 1 calc R . . 
H2C H 0.7069 -0.0942 0.9100 0.083 Uiso 1 1 calc R . . 
C3 C 0.2358(15) 0.1516(8) 0.7638(9) 0.040(3) Uani 1 1 d . . . 
N3 N 0.1186(12) 0.1261(7) 0.7206(8) 0.049(3) Uani 1 1 d . . . 
C4 C -0.0243(16) 0.1027(10) 0.6730(9) 0.062(4) Uani 1 1 d . . . 
H4A H -0.1034 0.1466 0.6890 0.093 Uiso 1 1 calc R . . 
H4B H -0.0519 0.0393 0.6900 0.093 Uiso 1 1 calc R . . 
H4C H -0.0196 0.1056 0.6060 0.093 Uiso 1 1 calc R . . 
C5 C 0.3691(15) 0.2240(8) 0.9359(10) 0.048(3) Uani 1 1 d . . . 
O5 O 0.3368(12) 0.2443(6) 1.0079(6) 0.068(3) Uani 1 1 d . . . 
C6 C 0.8174(16) 0.2037(8) 0.8728(8) 0.041(3) Uani 1 1 d . . . 
N6 N 0.9083(12) 0.1463(7) 0.9020(7) 0.048(3) Uani 1 1 d . . . 
C7 C 1.0090(15) 0.0719(8) 0.9304(8) 0.050(3) Uani 1 1 d . . . 
H7A H 0.9775 0.0430 0.9861 0.075 Uiso 1 1 calc R . . 
H7B H 1.1161 0.0952 0.9445 0.075 Uiso 1 1 calc R . . 
H7C H 1.0036 0.0255 0.8805 0.075 Uiso 1 1 calc R . . 
C8 C 0.7862(13) 0.3568(8) 0.7484(8) 0.038(3) Uani 1 1 d . . . 
N8 N 0.8591(12) 0.3984(7) 0.7025(8) 0.055(3) Uani 1 1 d . . . 
C9 C 0.9537(17) 0.4465(9) 0.6436(9) 0.080(5) Uani 1 1 d . . . 
H9A H 1.0312 0.4850 0.6819 0.120 Uiso 1 1 calc R . . 
H9B H 0.8873 0.4864 0.6000 0.120 Uiso 1 1 calc R . . 
H9C H 1.0073 0.4009 0.6089 0.120 Uiso 1 1 calc R . . 
C10 C 0.6839(14) 0.3517(8) 0.9221(9) 0.045(3) Uani 1 1 d . . . 
O10 O 0.6979(11) 0.3950(6) 0.9943(7) 0.070(3) Uani 1 1 d . . . 
C11 C 0.4830(14) 0.2492(8) 0.6187(8) 0.047(3) Uani 1 1 d . . . 
H11A H 0.5622 0.2756 0.5829 0.056 Uiso 1 1 calc R . . 
H11B H 0.4125 0.2088 0.5766 0.056 Uiso 1 1 calc R . . 
C12 C 0.3909(15) 0.3269(8) 0.6539(9) 0.056(4) Uani 1 1 d . . . 
H12A H 0.2785 0.3151 0.6342 0.067 Uiso 1 1 calc R . . 
H12B H 0.4181 0.3860 0.6247 0.067 Uiso 1 1 calc R . . 
  
loop_ 
 _atom_site_aniso_label 
 _atom_site_aniso_U_11 
 _atom_site_aniso_U_22 
 _atom_site_aniso_U_33 
 _atom_site_aniso_U_23 
 _atom_site_aniso_U_13 
 _atom_site_aniso_U_12 
Fe1 0.0394(9) 0.0283(7) 0.0397(10) 0.0014(8) 0.0161(8) 0.0019(7) 
Fe2 0.0415(9) 0.0263(7) 0.0402(10) -0.0023(8) 0.0150(8) -0.0001(8) 
S1 0.0408(16) 0.0301(15) 0.0386(17) -0.0045(12) 0.0143(14) 0.0018(12) 
S2 0.0473(17) 0.0302(13) 0.0446(18) 0.0047(13) 0.0185(15) 0.0071(14) 
C1 0.046(7) 0.063(8) 0.032(7) 0.004(6) 0.016(6) 0.006(7) 
N1 0.062(7) 0.039(6) 0.045(6) 0.020(5) 0.027(5) 0.019(5) 
C2 0.063(9) 0.039(7) 0.068(9) 0.013(6) 0.023(7) 0.001(6) 
C3 0.053(9) 0.024(6) 0.049(8) 0.006(5) 0.028(7) 0.012(6) 
N3 0.040(7) 0.046(6) 0.065(8) -0.002(5) 0.019(6) -0.008(5) 
C4 0.061(9) 0.084(10) 0.044(8) -0.005(8) 0.016(7) -0.009(8) 
C5 0.054(8) 0.037(6) 0.055(9) 0.021(6) 0.016(7) 0.014(6) 
O5 0.115(8) 0.059(6) 0.040(5) 0.002(4) 0.046(6) 0.021(5) 
C6 0.064(8) 0.040(7) 0.021(6) -0.005(5) 0.015(6) -0.013(6) 
N6 0.051(6) 0.047(6) 0.045(7) 0.016(5) 0.004(5) 0.011(5) 
C7 0.069(9) 0.038(7) 0.047(8) 0.004(6) 0.021(7) 0.014(6) 
C8 0.035(6) 0.043(7) 0.032(7) -0.002(5) -0.005(6) -0.003(6) 
N8 0.060(7) 0.041(6) 0.071(8) -0.010(5) 0.034(6) -0.019(5) 
C9 0.130(14) 0.055(8) 0.070(10) -0.010(7) 0.067(11) -0.037(9) 
C10 0.043(7) 0.052(7) 0.043(8) 0.005(6) 0.012(6) 0.012(6) 
O10 0.097(8) 0.063(6) 0.053(6) -0.016(5) 0.015(6) 0.015(5) 
C11 0.052(7) 0.043(6) 0.049(8) -0.008(6) 0.020(6) -0.002(6) 
C12 0.057(8) 0.048(8) 0.066(10) 0.015(7) 0.018(7) 0.008(6) 
  
_geom_special_details 
; 
 All esds (except the esd in the dihedral angle between two l.s. planes) 
 are estimated using the full covariance matrix.  The cell esds are taken 
 into account individually in the estimation of esds in distances, angles 
 and torsion angles; correlations between esds in cell parameters are only 
 used when they are defined by crystal symmetry.  An approximate (isotropic) 
 treatment of cell esds is used for estimating esds involving l.s. planes. 
; 
  
loop_ 
 _geom_bond_atom_site_label_1 
 _geom_bond_atom_site_label_2 
 _geom_bond_distance 
 _geom_bond_site_symmetry_2 
 _geom_bond_publ_flag 
Fe1 C5 1.770(14) . ? 
Fe1 C1 1.851(13) . ? 
Fe1 C3 1.855(15) . ? 
Fe1 S2 2.252(3) . ? 
Fe1 S1 2.256(3) . ? 
Fe1 Fe2 2.520(2) . ? 
Fe2 C10 1.703(13) . ? 
Fe2 C6 1.842(14) . ? 
Fe2 C8 1.870(12) . ? 
Fe2 S1 2.255(3) . ? 
Fe2 S2 2.256(3) . ? 
S1 C11 1.831(12) . ? 
S2 C12 1.807(14) . ? 
C1 N1 1.158(14) . ? 
N1 C2 1.427(14) . ? 
C3 N3 1.175(15) . ? 
N3 C4 1.374(17) . ? 
C5 O5 1.156(13) . ? 
C6 N6 1.176(15) . ? 
N6 C7 1.403(15) . ? 
C8 N8 1.145(14) . ? 
N8 C9 1.437(14) . ? 
C10 O10 1.210(14) . ? 
C11 C12 1.499(15) . ? 
  
loop_ 
 _geom_angle_atom_site_label_1 
 _geom_angle_atom_site_label_2 
 _geom_angle_atom_site_label_3 
 _geom_angle 
 _geom_angle_site_symmetry_1 
 _geom_angle_site_symmetry_3 
 _geom_angle_publ_flag 
C5 Fe1 C1 91.3(5) . . ? 
C5 Fe1 C3 101.3(5) . . ? 
C1 Fe1 C3 98.8(5) . . ? 
C5 Fe1 S2 92.3(3) . . ? 
C1 Fe1 S2 159.9(4) . . ? 
C3 Fe1 S2 99.9(3) . . ? 
C5 Fe1 S1 157.5(4) . . ? 
C1 Fe1 S1 89.2(3) . . ? 
C3 Fe1 S1 100.8(3) . . ? 
S2 Fe1 S1 80.02(10) . . ? 
C5 Fe1 Fe2 102.2(4) . . ? 
C1 Fe1 Fe2 103.8(4) . . ? 
C3 Fe1 Fe2 146.8(4) . . ? 
S2 Fe1 Fe2 56.09(9) . . ? 
S1 Fe1 Fe2 56.02(8) . . ? 
C10 Fe2 C6 92.5(5) . . ? 
C10 Fe2 C8 102.3(5) . . ? 
C6 Fe2 C8 99.5(5) . . ? 
C10 Fe2 S1 159.9(4) . . ? 
C6 Fe2 S1 88.7(3) . . ? 
C8 Fe2 S1 97.3(4) . . ? 
C10 Fe2 S2 91.2(4) . . ? 
C6 Fe2 S2 156.0(4) . . ? 
C8 Fe2 S2 102.9(4) . . ? 
S1 Fe2 S2 79.94(12) . . ? 
C10 Fe2 Fe1 104.1(4) . . ? 
C6 Fe2 Fe1 100.2(4) . . ? 
C8 Fe2 Fe1 146.1(3) . . ? 
S1 Fe2 Fe1 56.05(8) . . ? 
S2 Fe2 Fe1 55.93(8) . . ? 
C11 S1 Fe2 103.2(4) . . ? 
C11 S1 Fe1 104.6(4) . . ? 
Fe2 S1 Fe1 67.93(9) . . ? 
C12 S2 Fe1 101.7(4) . . ? 
C12 S2 Fe2 104.9(4) . . ? 
Fe1 S2 Fe2 67.99(9) . . ? 
N1 C1 Fe1 177.8(11) . . ? 
C1 N1 C2 175.7(14) . . ? 
N3 C3 Fe1 177.6(10) . . ? 
C3 N3 C4 175.2(12) . . ? 
O5 C5 Fe1 178.1(11) . . ? 
N6 C6 Fe2 176.2(11) . . ? 
C6 N6 C7 174.4(13) . . ? 
N8 C8 Fe2 179.2(11) . . ? 
C8 N8 C9 177.3(12) . . ? 
O10 C10 Fe2 177.9(10) . . ? 
C12 C11 S1 110.9(8) . . ? 
C11 C12 S2 114.0(9) . . ? 
  
_diffrn_measured_fraction_theta_max    1.000 
_diffrn_reflns_theta_full              25.03 
_diffrn_measured_fraction_theta_full   1.000 
_refine_diff_density_max    0.672 
_refine_diff_density_min   -0.404 
_refine_diff_density_rms    0.131 
  

#===END
 
data_p25rfas 
 
_audit_creation_method            SHELXL-97 
_audit_update_record 
; 
2002-04-17   text and data added, jdl 
; 
 
_chemical_name_systematic 
; 
? 
; 
_chemical_name_common            ? 
_chemical_melting_point          ? 
_chemical_formula_moiety         'C17 H27 Fe2 N7 S2 2+, 2(F6 P 1-), C H2 Cl2' 
_chemical_formula_sum 
 'C18 H29 Cl2 F12 Fe2 N7 P2 S2' 
_chemical_formula_structural     ? 
_chemical_formula_weight          880.14 
 
_chemical_formula_analytical     ? 
_chemical_compound_source        ? 
 
loop_ 
 _atom_type_symbol 
 _atom_type_description 
 _atom_type_scat_dispersion_real 
 _atom_type_scat_dispersion_imag 
 _atom_type_scat_source 
 'C'  'C'   0.0033   0.0016 
 'International Tables Vol C Tables 4.2.6.8 and 6.1.1.4' 
 'H'  'H'   0.0000   0.0000 
 'International Tables Vol C Tables 4.2.6.8 and 6.1.1.4' 
 'N'  'N'   0.0061   0.0033 
 'International Tables Vol C Tables 4.2.6.8 and 6.1.1.4' 
 'F'  'F'   0.0171   0.0103 
 'International Tables Vol C Tables 4.2.6.8 and 6.1.1.4' 
 'P'  'P'   0.1023   0.0942 
 'International Tables Vol C Tables 4.2.6.8 and 6.1.1.4' 
 'S'  'S'   0.1246   0.1234 
 'International Tables Vol C Tables 4.2.6.8 and 6.1.1.4' 
 'Cl'  'Cl'   0.1484   0.1585 
 'International Tables Vol C Tables 4.2.6.8 and 6.1.1.4' 
 'Fe'  'Fe'   0.3463   0.8444 
 'International Tables Vol C Tables 4.2.6.8 and 6.1.1.4' 
 
_symmetry_cell_setting           'Monoclinic' 
_symmetry_space_group_name_H-M   'P 21/n' 
_symmetry_space_group_name_Hall  '-P 2yn' 
 
loop_ 
 _symmetry_equiv_pos_as_xyz 
 'x, y, z' 
 '-x+1/2, y+1/2, -z+1/2' 
 '-x, -y, -z' 
 'x-1/2, -y-1/2, z-1/2' 
 
_cell_length_a                    9.984(3) 
_cell_length_b                    15.877(4) 
_cell_length_c                    22.094(6) 
_cell_angle_alpha                 90.00 
_cell_angle_beta                  99.658(5) 
_cell_angle_gamma                 90.00 
_cell_volume                      3452.7(15) 
_cell_formula_units_Z             4 
_cell_measurement_temperature     193(2) 
_cell_measurement_reflns_used     889 
_cell_measurement_theta_min        2.57 
_cell_measurement_theta_max       23.78 
_exptl_crystal_description       'platy' 
_exptl_crystal_colour            'dark' 
_exptl_crystal_size_max          0.20 
_exptl_crystal_size_mid          0.15 
_exptl_crystal_size_min          0.04 
_exptl_crystal_density_meas      'not measured' 
_exptl_crystal_density_diffrn     1.693 
_exptl_crystal_density_method    ? 
_exptl_crystal_F_000              1768 
_exptl_crystal_id                p25rfas 
 
_exptl_crystal_preparation 
; 
All crystals examined suffered from nonmerohedral twinning defined 
by a pseudo-twofold axis normal to the b,c-plane.  The primary and 
secondary oreintations were integrated separately. All reflections 
with complete or no overlap from both sets were combined and refined 
against a batch scale factor.  The data crystal was mounted using oil 
(Parantone-N, Exxon) to a thin glass fiber with the (0 0 1) 
scattering planes of the primary orientation and (0 0 -1) planes of 
the secondary orientation roughly normal to the spindle axis.  Faces 
for the primary orientation are listed herein. 
; 
 
_exptl_absorpt_coefficient_mu     1.298 
_exptl_absorpt_correction_type   'integration' 
_exptl_absorpt_correction_T_min  0.75642 
_exptl_absorpt_correction_T_max  0.95036 
_exptl_absorpt_process_details   '(Bruker, 2000)' 
 
_exptl_special_details 
; 
 ? 
; 
 
_diffrn_ambient_temperature       193(2) 
_diffrn_radiation_wavelength      0.71073 
_diffrn_radiation_wavelength_id  p25rfas 
_diffrn_radiation_type           'MoK\a' 
_diffrn_radiation_source         'normal-focus sealed tube' 
_diffrn_radiation_monochromator  'graphite' 
_diffrn_measurement_device_type   ? 
_diffrn_measurement_device       'Siemens Platform/CCD' 
_diffrn_measurement_method       'profile data from \w scans' 
 
_diffrn_detector_area_resol_mean  ? 
_diffrn_standards_number         175 
_diffrn_standards_interval_count  ? 
_diffrn_standards_interval_time  402 
 
_diffrn_standards_decay_%        5.4 
_diffrn_reflns_number            24185 
 
_diffrn_reflns_av_R_equivalents   0.0000 
_diffrn_reflns_av_sigmaI/netI     0.1753 
_diffrn_reflns_limit_h_min        -12 
_diffrn_reflns_limit_h_max        11 
_diffrn_reflns_limit_k_min        -19 
_diffrn_reflns_limit_k_max        19 
_diffrn_reflns_limit_l_min        -26 
_diffrn_reflns_limit_l_max        26 
_diffrn_reflns_theta_min          1.59 
_diffrn_reflns_theta_max          25.36 
_reflns_number_total              23773 
_reflns_number_gt                 11263 
_reflns_threshold_expression      >2sigma(I) 
 
_computing_data_collection       'SMART V5 (Bruker, 2001)' 
_computing_cell_refinement       'SAINT V6 (Bruker, 2001)' 
_computing_data_reduction        'SAINT V6 (Bruker, 2001)' 
_computing_structure_solution    'SHELXTL V6 (Bruker, 2000)' 
_computing_structure_refinement  'SHELXTL V6 (Bruker, 2000)' 
_computing_molecular_graphics    'SHELXTL V6 (Bruker, 2000)' 
_computing_publication_material  'CIFTAB (Sheldrick, 2000)' 
 
_refine_special_details 
; 
? 
; 
 
_refine_ls_structure_factor_coef  Fsqd 
_refine_ls_matrix_type            full 
_refine_ls_weighting_scheme       calc 
_refine_ls_weighting_details 
 'calc w=1/[\s^2^(Fo^2^)+(0.0755P)^2^+0.0000P] where P=(Fo^2^+2Fc^2^)/3' 
_atom_sites_solution_primary      direct 
_atom_sites_solution_secondary    difmap 
_atom_sites_solution_hydrogens    geom 
_refine_ls_hydrogen_treatment    noref 
_refine_ls_extinction_method      none 
_refine_ls_extinction_coef        ? 
_refine_ls_number_reflns          23773 
_refine_ls_number_parameters      407 
_refine_ls_number_restraints      0 
_refine_ls_R_factor_all           0.1649 
_refine_ls_R_factor_gt            0.0709 
_refine_ls_wR_factor_ref          0.1870 
_refine_ls_wR_factor_gt           0.1557 
_refine_ls_goodness_of_fit_ref    0.912 
_refine_ls_restrained_S_all       0.912 
_refine_ls_shift/su_max           0.014 
_refine_ls_shift/su_mean          0.002 
 
loop_ 
 _atom_site_label 
 _atom_site_type_symbol 
 _atom_site_fract_x 
 _atom_site_fract_y 
 _atom_site_fract_z 
 _atom_site_U_iso_or_equiv 
 _atom_site_adp_type 
 _atom_site_occupancy 
 _atom_site_symmetry_multiplicity 
 _atom_site_calc_flag 
 _atom_site_refinement_flags 
 _atom_site_disorder_assembly 
 _atom_site_disorder_group 
Fe1 Fe 0.21596(7) 0.52211(4) 0.18370(3) 0.0297(2) Uani 1 1 d . . . 
Fe2 Fe 0.22925(7) 0.51512(4) 0.30369(3) 0.0283(2) Uani 1 1 d . . . 
S1 S 0.05437(14) 0.46804(8) 0.23097(6) 0.0359(4) Uani 1 1 d . . . 
S2 S 0.21106(13) 0.63602(7) 0.24545(6) 0.0307(3) Uani 1 1 d . . . 
C1 C 0.1092(5) 0.5499(3) 0.3549(2) 0.0298(14) Uani 1 1 d . . . 
N1 N 0.0378(4) 0.5702(2) 0.3881(2) 0.0307(11) Uani 1 1 d . . . 
C2 C -0.0528(6) 0.5930(3) 0.4286(3) 0.0512(17) Uani 1 1 d . . . 
H2A H -0.1058 0.5436 0.4368 0.061 Uiso 1 1 calc R . . 
H2B H -0.1144 0.6372 0.4096 0.061 Uiso 1 1 calc R . . 
H2C H -0.0007 0.6139 0.4672 0.061 Uiso 1 1 calc R . . 
C3 C 0.3703(5) 0.5578(3) 0.3629(3) 0.0293(14) Uani 1 1 d . . . 
N2 N 0.4556(5) 0.5811(2) 0.4006(2) 0.0351(12) Uani 1 1 d . . . 
C4 C 0.5670(5) 0.6049(3) 0.4468(3) 0.0514(18) Uani 1 1 d . . . 
H4A H 0.6261 0.5561 0.4578 0.062 Uiso 1 1 calc R . . 
H4B H 0.5324 0.6250 0.4832 0.062 Uiso 1 1 calc R . . 
H4C H 0.6188 0.6499 0.4311 0.062 Uiso 1 1 calc R . . 
C5 C 0.2417(5) 0.4101(3) 0.3439(2) 0.0296(14) Uani 1 1 d . . . 
N3 N 0.2493(4) 0.3470(3) 0.3691(2) 0.0368(12) Uani 1 1 d . . . 
C6 C 0.2646(6) 0.2697(3) 0.4013(2) 0.065(2) Uani 1 1 d . . . 
H6A H 0.3605 0.2613 0.4188 0.078 Uiso 1 1 calc R . . 
H6B H 0.2336 0.2235 0.3730 0.078 Uiso 1 1 calc R . . 
H6C H 0.2103 0.2708 0.4343 0.078 Uiso 1 1 calc R . . 
C7 C 0.3735(5) 0.4707(3) 0.2631(2) 0.0254(13) Uani 1 1 d . . . 
N4 N 0.4752(4) 0.4404(2) 0.26064(19) 0.0296(11) Uani 1 1 d . . . 
C8 C 0.5965(5) 0.4066(3) 0.2447(3) 0.0499(17) Uani 1 1 d . . . 
H8A H 0.6037 0.4233 0.2027 0.060 Uiso 1 1 calc R . . 
H8B H 0.5945 0.3450 0.2475 0.060 Uiso 1 1 calc R . . 
H8C H 0.6751 0.4283 0.2731 0.060 Uiso 1 1 calc R . . 
C9 C 0.1034(6) 0.5553(3) 0.1141(3) 0.0340(15) Uani 1 1 d . . . 
N5 N 0.0308(5) 0.5731(3) 0.0701(2) 0.0440(13) Uani 1 1 d . . . 
C10 C -0.0696(6) 0.5969(3) 0.0183(3) 0.0608(19) Uani 1 1 d . . . 
H10A H -0.1365 0.5515 0.0090 0.073 Uiso 1 1 calc R . . 
H10B H -0.0253 0.6068 -0.0174 0.073 Uiso 1 1 calc R . . 
H10C H -0.1155 0.6485 0.0281 0.073 Uiso 1 1 calc R . . 
C11 C 0.3673(6) 0.5618(3) 0.1526(2) 0.0349(15) Uani 1 1 d . . . 
N6 N 0.4587(5) 0.5831(2) 0.1305(2) 0.0309(11) Uani 1 1 d . . . 
C12 C 0.5665(5) 0.6079(3) 0.0976(3) 0.0475(17) Uani 1 1 d . . . 
H12A H 0.6041 0.5577 0.0808 0.057 Uiso 1 1 calc R . . 
H12B H 0.6383 0.6367 0.1258 0.057 Uiso 1 1 calc R . . 
H12C H 0.5299 0.6460 0.0640 0.057 Uiso 1 1 calc R . . 
C13 C 0.2386(5) 0.4168(3) 0.1495(2) 0.0363(15) Uani 1 1 d . . . 
N7 N 0.2577(5) 0.3524(3) 0.1283(2) 0.0463(14) Uani 1 1 d . . . 
C14 C 0.2801(7) 0.2728(3) 0.1018(3) 0.085(3) Uani 1 1 d . . . 
H14A H 0.3546 0.2777 0.0782 0.102 Uiso 1 1 calc R . . 
H14B H 0.1972 0.2550 0.0745 0.102 Uiso 1 1 calc R . . 
H14C H 0.3040 0.2310 0.1345 0.102 Uiso 1 1 calc R . . 
C15 C 0.0403(5) 0.6792(3) 0.2420(2) 0.0390(15) Uani 1 1 d . . . 
H15A H 0.0246 0.6879 0.2846 0.047 Uiso 1 1 calc R . . 
H15B H 0.0381 0.7353 0.2223 0.047 Uiso 1 1 calc R . . 
C16 C -0.0768(5) 0.6283(3) 0.2085(2) 0.0447(16) Uani 1 1 d . . . 
H16A H -0.1619 0.6586 0.2119 0.054 Uiso 1 1 calc R . . 
H16B H -0.0687 0.6272 0.1644 0.054 Uiso 1 1 calc R . . 
C17 C -0.0911(5) 0.5397(3) 0.2290(2) 0.0466(16) Uani 1 1 d . . . 
H17A H -0.1695 0.5143 0.2017 0.056 Uiso 1 1 calc R . . 
H17B H -0.1145 0.5415 0.2708 0.056 Uiso 1 1 calc R . . 
P1 P -0.2064(2) 0.85419(10) 0.43183(8) 0.0569(5) Uani 1 1 d . . . 
F1 F -0.2720(5) 0.9253(3) 0.3911(2) 0.143(2) Uani 1 1 d . . . 
F2 F -0.0635(4) 0.8954(2) 0.4352(2) 0.1023(14) Uani 1 1 d . . . 
F3 F -0.1388(5) 0.7805(2) 0.4729(2) 0.135(2) Uani 1 1 d . . . 
F4 F -0.2292(4) 0.9031(2) 0.49081(19) 0.1121(15) Uani 1 1 d . . . 
F5 F -0.3508(5) 0.8125(3) 0.4286(2) 0.1253(17) Uani 1 1 d . . . 
F6 F -0.1820(5) 0.8013(2) 0.37353(17) 0.1170(16) Uani 1 1 d . . . 
P2 P 0.79562(19) 0.85416(11) 0.06930(8) 0.0569(5) Uani 1 1 d . . . 
F7 F 0.9303(4) 0.9046(2) 0.0877(2) 0.1167(17) Uani 1 1 d . . . 
F8 F 0.8761(5) 0.7964(2) 0.0288(2) 0.1233(17) Uani 1 1 d . . . 
F9 F 0.8384(4) 0.7934(2) 0.12511(17) 0.0994(14) Uani 1 1 d . . . 
F10 F 0.7548(4) 0.9157(2) 0.01360(17) 0.0920(13) Uani 1 1 d . . . 
F11 F 0.6683(5) 0.8002(3) 0.0481(2) 0.182(3) Uani 1 1 d . . . 
F12 F 0.7235(6) 0.9119(3) 0.1090(2) 0.169(3) Uani 1 1 d . . . 
C18 C 0.5516(6) 0.7431(3) 0.2732(3) 0.0582(19) Uani 1 1 d . . . 
H18A H 0.4518 0.7372 0.2693 0.070 Uiso 1 1 calc R . . 
H18B H 0.5829 0.7828 0.3072 0.070 Uiso 1 1 calc R . . 
Cl1 Cl 0.59139(17) 0.78363(9) 0.20488(8) 0.0645(5) Uani 1 1 d . . . 
Cl2 Cl 0.62875(18) 0.64438(10) 0.29041(8) 0.0736(6) Uani 1 1 d . . . 
 
loop_ 
 _atom_site_aniso_label 
 _atom_site_aniso_U_11 
 _atom_site_aniso_U_22 
 _atom_site_aniso_U_33 
 _atom_site_aniso_U_23 
 _atom_site_aniso_U_13 
 _atom_site_aniso_U_12 
Fe1 0.0362(5) 0.0243(4) 0.0269(5) -0.0002(4) 0.0004(4) -0.0004(4) 
Fe2 0.0313(5) 0.0248(4) 0.0282(5) -0.0007(4) 0.0034(4) -0.0017(4) 
S1 0.0362(9) 0.0336(8) 0.0358(9) 0.0015(7) 0.0001(7) -0.0074(7) 
S2 0.0331(8) 0.0250(7) 0.0332(9) 0.0000(7) 0.0028(7) 0.0000(6) 
C1 0.035(4) 0.022(3) 0.030(4) 0.007(2) -0.004(3) -0.003(2) 
N1 0.030(3) 0.037(3) 0.027(3) -0.009(2) 0.009(2) -0.001(2) 
C2 0.050(4) 0.057(4) 0.049(5) -0.008(3) 0.013(4) 0.000(3) 
C3 0.030(4) 0.025(3) 0.033(4) 0.000(3) 0.006(3) 0.008(3) 
N2 0.033(3) 0.033(3) 0.037(3) -0.004(2) -0.001(3) -0.003(2) 
C4 0.046(4) 0.049(4) 0.055(5) -0.022(3) -0.004(4) -0.001(3) 
C5 0.028(3) 0.032(3) 0.030(4) -0.001(3) 0.009(3) -0.008(3) 
N3 0.039(3) 0.031(3) 0.036(3) 0.007(2) -0.007(2) -0.005(2) 
C6 0.111(6) 0.032(3) 0.042(5) 0.019(3) -0.016(4) -0.008(4) 
C7 0.036(4) 0.018(3) 0.018(3) 0.003(2) -0.007(3) -0.004(3) 
N4 0.024(3) 0.030(3) 0.035(3) 0.005(2) 0.003(2) 0.003(2) 
C8 0.047(4) 0.047(4) 0.060(5) -0.001(3) 0.019(4) 0.005(3) 
C9 0.048(4) 0.024(3) 0.028(4) -0.008(3) -0.002(3) -0.005(3) 
N5 0.054(4) 0.041(3) 0.034(3) -0.003(3) 0.001(3) 0.000(3) 
C10 0.080(5) 0.060(4) 0.035(4) -0.002(3) -0.014(4) 0.024(4) 
C11 0.051(4) 0.023(3) 0.030(4) -0.007(3) 0.002(3) 0.012(3) 
N6 0.037(3) 0.028(3) 0.026(3) -0.001(2) 0.001(2) 0.009(2) 
C12 0.043(4) 0.050(4) 0.051(5) 0.002(3) 0.012(4) -0.006(3) 
C13 0.045(4) 0.033(3) 0.027(4) 0.003(3) -0.004(3) 0.005(3) 
N7 0.066(4) 0.036(3) 0.031(3) -0.006(2) -0.011(3) 0.007(3) 
C14 0.153(8) 0.035(4) 0.059(5) -0.011(3) -0.006(5) 0.034(4) 
C15 0.038(4) 0.034(3) 0.044(4) 0.004(3) 0.004(3) 0.009(3) 
C16 0.030(4) 0.064(4) 0.037(4) 0.016(3) -0.003(3) 0.018(3) 
C17 0.033(4) 0.061(4) 0.043(4) 0.003(3) -0.001(3) 0.001(3) 
P1 0.0896(16) 0.0415(10) 0.0365(12) 0.0048(9) 0.0015(11) -0.0131(10) 
F1 0.149(5) 0.122(4) 0.132(5) 0.081(3) -0.053(3) -0.010(3) 
F2 0.080(3) 0.103(3) 0.119(4) -0.017(3) 0.002(3) -0.024(2) 
F3 0.228(6) 0.079(3) 0.110(4) 0.038(3) 0.059(4) 0.072(3) 
F4 0.120(4) 0.126(3) 0.083(4) -0.058(3) -0.003(3) 0.030(3) 
F5 0.140(4) 0.125(3) 0.125(4) -0.036(3) 0.066(3) -0.071(3) 
F6 0.164(5) 0.139(4) 0.052(3) -0.042(3) 0.031(3) -0.057(3) 
P2 0.0692(14) 0.0542(11) 0.0436(13) 0.0061(10) -0.0011(11) -0.0037(11) 
F7 0.115(4) 0.090(3) 0.122(4) 0.010(3) -0.047(3) -0.031(3) 
F8 0.202(5) 0.077(3) 0.105(4) -0.022(3) 0.066(4) 0.001(3) 
F9 0.155(4) 0.072(3) 0.066(3) 0.031(2) 0.006(3) 0.027(3) 
F10 0.094(3) 0.116(3) 0.058(3) 0.042(2) -0.011(2) -0.017(2) 
F11 0.138(5) 0.217(5) 0.167(5) 0.112(4) -0.040(4) -0.114(4) 
F12 0.266(7) 0.167(4) 0.096(4) 0.063(3) 0.094(4) 0.156(5) 
C18 0.049(4) 0.059(4) 0.076(5) -0.023(3) 0.037(4) -0.002(3) 
Cl1 0.0655(13) 0.0625(11) 0.0672(13) -0.0077(9) 0.0161(10) 0.0028(9) 
Cl2 0.0947(15) 0.0595(11) 0.0727(14) -0.0026(9) 0.0318(11) -0.0125(10) 
 
_geom_special_details 
; 
 All esds (except the esd in the dihedral angle between two l.s. planes) 
 are estimated using the full covariance matrix.  The cell esds are taken 
 into account individually in the estimation of esds in distances, angles 
 and torsion angles; correlations between esds in cell parameters are only 
 used when they are defined by crystal symmetry.  An approximate (isotropic) 
 treatment of cell esds is used for estimating esds involving l.s. planes. 
; 
 
loop_ 
 _geom_bond_atom_site_label_1 
 _geom_bond_atom_site_label_2 
 _geom_bond_distance 
 _geom_bond_site_symmetry_2 
 _geom_bond_publ_flag 
Fe1 C9 1.824(6) . ? 
Fe1 C13 1.864(5) . ? 
Fe1 C11 1.872(6) . ? 
Fe1 S1 2.2350(15) . ? 
Fe1 S2 2.2709(15) . ? 
Fe1 C7 2.300(5) . ? 
Fe1 Fe2 2.6342(12) . ? 
Fe2 C1 1.864(6) . ? 
Fe2 C3 1.880(6) . ? 
Fe2 C5 1.884(5) . ? 
Fe2 C7 1.952(5) . ? 
Fe2 S1 2.2906(16) . ? 
Fe2 S2 2.3011(15) . ? 
S1 C17 1.839(5) . ? 
S2 C15 1.827(5) . ? 
C1 N1 1.152(5) . ? 
N1 C2 1.422(6) . ? 
C2 H2A 0.9800 . ? 
C2 H2B 0.9800 . ? 
C2 H2C 0.9800 . ? 
C3 N2 1.148(6) . ? 
N2 C4 1.428(6) . ? 
C4 H4A 0.9800 . ? 
C4 H4B 0.9800 . ? 
C4 H4C 0.9800 . ? 
C5 N3 1.143(5) . ? 
N3 C6 1.413(5) . ? 
C6 H6A 0.9800 . ? 
C6 H6B 0.9800 . ? 
C6 H6C 0.9800 . ? 
C7 N4 1.133(5) . ? 
N4 C8 1.422(6) . ? 
C8 H8A 0.9800 . ? 
C8 H8B 0.9800 . ? 
C8 H8C 0.9800 . ? 
C9 N5 1.145(6) . ? 
N5 C10 1.440(6) . ? 
C10 H10A 0.9800 . ? 
C10 H10B 0.9800 . ? 
C10 H10C 0.9800 . ? 
C11 N6 1.154(6) . ? 
N6 C12 1.450(6) . ? 
C12 H12A 0.9800 . ? 
C12 H12B 0.9800 . ? 
C12 H12C 0.9800 . ? 
C13 N7 1.155(5) . ? 
N7 C14 1.426(6) . ? 
C14 H14A 0.9800 . ? 
C14 H14B 0.9800 . ? 
C14 H14C 0.9800 . ? 
C15 C16 1.509(6) . ? 
C15 H15A 0.9900 . ? 
C15 H15B 0.9900 . ? 
C16 C17 1.493(6) . ? 
C16 H16A 0.9900 . ? 
C16 H16B 0.9900 . ? 
C17 H17A 0.9900 . ? 
C17 H17B 0.9900 . ? 
P1 F1 1.522(4) . ? 
P1 F2 1.561(4) . ? 
P1 F3 1.563(4) . ? 
P1 F4 1.566(4) . ? 
P1 F5 1.577(4) . ? 
P1 F6 1.590(4) . ? 
P2 F12 1.531(4) . ? 
P2 F11 1.539(4) . ? 
P2 F7 1.560(4) . ? 
P2 F10 1.571(4) . ? 
P2 F9 1.567(3) . ? 
P2 F8 1.591(4) . ? 
C18 Cl1 1.746(5) . ? 
C18 Cl2 1.759(5) . ? 
C18 H18A 0.9900 . ? 
C18 H18B 0.9900 . ? 
 
loop_ 
 _geom_angle_atom_site_label_1 
 _geom_angle_atom_site_label_2 
 _geom_angle_atom_site_label_3 
 _geom_angle 
 _geom_angle_site_symmetry_1 
 _geom_angle_site_symmetry_3 
 _geom_angle_publ_flag 
C9 Fe1 C13 90.9(2) . . ? 
C9 Fe1 C11 90.8(2) . . ? 
C13 Fe1 C11 89.6(2) . . ? 
C9 Fe1 S1 96.56(18) . . ? 
C13 Fe1 S1 89.49(17) . . ? 
C11 Fe1 S1 172.62(17) . . ? 
C9 Fe1 S2 101.80(15) . . ? 
C13 Fe1 S2 166.96(16) . . ? 
C11 Fe1 S2 93.01(15) . . ? 
S1 Fe1 S2 86.29(5) . . ? 
C9 Fe1 C7 172.4(2) . . ? 
C13 Fe1 C7 82.9(2) . . ? 
C11 Fe1 C7 84.8(2) . . ? 
S1 Fe1 C7 87.84(13) . . ? 
S2 Fe1 C7 84.59(13) . . ? 
C9 Fe1 Fe2 141.35(17) . . ? 
C13 Fe1 Fe2 112.41(16) . . ? 
C11 Fe1 Fe2 118.47(17) . . ? 
S1 Fe1 Fe2 55.39(4) . . ? 
S2 Fe1 Fe2 55.36(4) . . ? 
C7 Fe1 Fe2 46.00(13) . . ? 
C1 Fe2 C3 87.3(2) . . ? 
C1 Fe2 C5 88.5(2) . . ? 
C3 Fe2 C5 90.5(2) . . ? 
C1 Fe2 C7 170.0(2) . . ? 
C3 Fe2 C7 85.8(2) . . ? 
C5 Fe2 C7 84.4(2) . . ? 
C1 Fe2 S1 91.75(16) . . ? 
C3 Fe2 S1 177.90(15) . . ? 
C5 Fe2 S1 91.41(16) . . ? 
C7 Fe2 S1 95.38(15) . . ? 
C1 Fe2 S2 95.36(14) . . ? 
C3 Fe2 S2 93.90(15) . . ? 
C5 Fe2 S2 174.29(16) . . ? 
C7 Fe2 S2 92.27(14) . . ? 
S1 Fe2 S2 84.30(5) . . ? 
C1 Fe2 Fe1 132.00(15) . . ? 
C3 Fe2 Fe1 126.18(16) . . ? 
C5 Fe2 Fe1 120.04(15) . . ? 
C7 Fe2 Fe1 57.93(14) . . ? 
S1 Fe2 Fe1 53.43(4) . . ? 
S2 Fe2 Fe1 54.28(4) . . ? 
C17 S1 Fe1 112.35(18) . . ? 
C17 S1 Fe2 108.73(18) . . ? 
Fe1 S1 Fe2 71.18(5) . . ? 
C15 S2 Fe1 112.81(17) . . ? 
C15 S2 Fe2 108.78(17) . . ? 
Fe1 S2 Fe2 70.36(5) . . ? 
N1 C1 Fe2 177.7(5) . . ? 
C1 N1 C2 178.3(5) . . ? 
N1 C2 H2A 109.5 . . ? 
N1 C2 H2B 109.5 . . ? 
H2A C2 H2B 109.5 . . ? 
N1 C2 H2C 109.5 . . ? 
H2A C2 H2C 109.5 . . ? 
H2B C2 H2C 109.5 . . ? 
N2 C3 Fe2 177.2(5) . . ? 
C3 N2 C4 176.0(5) . . ? 
N2 C4 H4A 109.5 . . ? 
N2 C4 H4B 109.5 . . ? 
H4A C4 H4B 109.5 . . ? 
N2 C4 H4C 109.5 . . ? 
H4A C4 H4C 109.5 . . ? 
H4B C4 H4C 109.5 . . ? 
N3 C5 Fe2 179.1(5) . . ? 
C5 N3 C6 177.5(5) . . ? 
N3 C6 H6A 109.5 . . ? 
N3 C6 H6B 109.5 . . ? 
H6A C6 H6B 109.5 . . ? 
N3 C6 H6C 109.5 . . ? 
H6A C6 H6C 109.5 . . ? 
H6B C6 H6C 109.5 . . ? 
N4 C7 Fe2 155.7(4) . . ? 
N4 C7 Fe1 128.2(4) . . ? 
Fe2 C7 Fe1 76.08(18) . . ? 
C7 N4 C8 168.3(5) . . ? 
N4 C8 H8A 109.5 . . ? 
N4 C8 H8B 109.5 . . ? 
H8A C8 H8B 109.5 . . ? 
N4 C8 H8C 109.5 . . ? 
H8A C8 H8C 109.5 . . ? 
H8B C8 H8C 109.5 . . ? 
N5 C9 Fe1 177.4(5) . . ? 
C9 N5 C10 174.8(6) . . ? 
N5 C10 H10A 109.5 . . ? 
N5 C10 H10B 109.5 . . ? 
H10A C10 H10B 109.5 . . ? 
N5 C10 H10C 109.5 . . ? 
H10A C10 H10C 109.5 . . ? 
H10B C10 H10C 109.5 . . ? 
N6 C11 Fe1 176.0(5) . . ? 
C11 N6 C12 175.0(6) . . ? 
N6 C12 H12A 109.5 . . ? 
N6 C12 H12B 109.5 . . ? 
H12A C12 H12B 109.5 . . ? 
N6 C12 H12C 109.5 . . ? 
H12A C12 H12C 109.5 . . ? 
H12B C12 H12C 109.5 . . ? 
N7 C13 Fe1 177.4(5) . . ? 
C13 N7 C14 179.5(6) . . ? 
N7 C14 H14A 109.5 . . ? 
N7 C14 H14B 109.5 . . ? 
H14A C14 H14B 109.5 . . ? 
N7 C14 H14C 109.5 . . ? 
H14A C14 H14C 109.5 . . ? 
H14B C14 H14C 109.5 . . ? 
C16 C15 S2 117.4(3) . . ? 
C16 C15 H15A 107.9 . . ? 
S2 C15 H15A 107.9 . . ? 
C16 C15 H15B 107.9 . . ? 
S2 C15 H15B 107.9 . . ? 
H15A C15 H15B 107.2 . . ? 
C17 C16 C15 117.5(4) . . ? 
C17 C16 H16A 107.9 . . ? 
C15 C16 H16A 107.9 . . ? 
C17 C16 H16B 107.9 . . ? 
C15 C16 H16B 107.9 . . ? 
H16A C16 H16B 107.2 . . ? 
C16 C17 S1 118.4(4) . . ? 
C16 C17 H17A 107.7 . . ? 
S1 C17 H17A 107.7 . . ? 
C16 C17 H17B 107.7 . . ? 
S1 C17 H17B 107.7 . . ? 
H17A C17 H17B 107.1 . . ? 
F1 P1 F2 90.9(2) . . ? 
F1 P1 F3 179.3(3) . . ? 
F2 P1 F3 89.1(3) . . ? 
F1 P1 F4 90.9(3) . . ? 
F2 P1 F4 90.7(2) . . ? 
F3 P1 F4 89.8(2) . . ? 
F1 P1 F5 89.2(3) . . ? 
F2 P1 F5 179.9(3) . . ? 
F3 P1 F5 90.8(3) . . ? 
F4 P1 F5 89.2(2) . . ? 
F1 P1 F6 91.3(3) . . ? 
F2 P1 F6 89.8(2) . . ? 
F3 P1 F6 88.0(2) . . ? 
F4 P1 F6 177.8(3) . . ? 
F5 P1 F6 90.3(2) . . ? 
F12 P2 F11 93.7(4) . . ? 
F12 P2 F7 90.6(3) . . ? 
F11 P2 F7 175.7(3) . . ? 
F12 P2 F10 89.5(2) . . ? 
F11 P2 F10 90.9(2) . . ? 
F7 P2 F10 89.0(2) . . ? 
F12 P2 F9 90.6(2) . . ? 
F11 P2 F9 89.9(2) . . ? 
F7 P2 F9 90.1(2) . . ? 
F10 P2 F9 179.2(3) . . ? 
F12 P2 F8 177.6(3) . . ? 
F11 P2 F8 88.7(3) . . ? 
F7 P2 F8 87.0(3) . . ? 
F10 P2 F8 90.4(2) . . ? 
F9 P2 F8 89.5(2) . . ? 
Cl1 C18 Cl2 111.2(3) . . ? 
Cl1 C18 H18A 109.4 . . ? 
Cl2 C18 H18A 109.4 . . ? 
Cl1 C18 H18B 109.4 . . ? 
Cl2 C18 H18B 109.4 . . ? 
H18A C18 H18B 108.0 . . ? 
 
_diffrn_measured_fraction_theta_max    0.989 
_diffrn_reflns_theta_full              25.36 
_diffrn_measured_fraction_theta_full   0.989 
_refine_diff_density_max    1.303 
_refine_diff_density_min   -0.484 
_refine_diff_density_rms    0.137 
_publ_requested_category         CM 
 
_publ_section_references 
; 
 
Sheldrick, G.M. (2000).  SHELX-97-2.  Program for crystal structure solution 
and refinement.  Institute fur anorg chemie, G\"ottingen, Germany. 
 
Bruker AXS, Inc.  (2000).  Madison, Wisconsin, USA. 
; 
 
_publ_section_figure_captions 
; 
Figure 1.  SHELXTL (Bruker, 1998) plot showing 35% probability ellipsoids 
for non-H atoms and circles of arbitrary size for H atoms. 
; 
 
_publ_section_exptl_prep 
; 
Crystals were grown from hexane layered on methylene chloride. 
; 
 
_publ_section_exptl_refinement 
; 
Systematic conditions suggested the unambiguous space group.   Structure 
was solved by direct methods (Sheldrick, 2000).  H atoms were included as 
riding idealized contributors.  H atom U's were assigned as 1.2 times Ueq 
of adjacent non-H atoms. The space group choice was confirmed by 
successful convergence of the full-matrix least-squares refinement on 
F^2^ (Sheldrick, 2000).  The highest peak in the final difference 
Fourier map was in the vicinity of atom Fe1; remaining high peaks in the 
final map were near the two anions.  A final analysis of variance between 
observed and calculated structure factors showed no dependence on amplitude 
or resolution. 
; 
 
_publ_contact_author 
; 
Scott R. Wilson 
University of Illinois 
School of Chemical Sciences, Box 59-1 
505 South Mathews Avenue 
Urbana, Illinois  61801 
USA 
; 
_publ_contact_author_phone        '1  217 244 1708' 
_publ_contact_author_fax          '1  217 244 8068' 
_publ_contact_author_email        srwilson@uiuc.edu 
_publ_contact_letter 
; 
Please consider this CIF submission for publication as a structural paper 
in Acta Crystallographica C.  The figure and list of structure factors will 
be sent by normal mail. 
; 
_publ_requested_journal           'Acta Crystallographica C' 
_publ_requested_coeditor_name     ? 
 
_publ_section_title 
; 
 ? 
; 
 
_publ_section_abstract 
; 
 ? 
; 
 
_publ_section_comment 
; 
 ? 
; 
 
_publ_section_acknowledgements 
; 
The Materials Chemistry Laboratory at the Univeristy of Illinois was 
supported in part by Grant No. NSF CHE 95-03145 from the National Science 
Foundation. 
; 
 
loop_ 
 _publ_author_name 
 _publ_author_address 
'Wilson, Scott R.' 
; 
University of Illinois 
School of Chemical Sciences, Box 59-1 
505 South Mathews Avenue 
Urbana, Illinois  61801 
USA 
; 
'Prussak-Wieckowska, Teresa' 
; 
University of Illinois 
School of Chemical Sciences, Box 59-1 
505 South Mathews Avenue 
Urbana, Illinois  61801 
USA 
; 
 
loop_ 
 _exptl_crystal_face_index_h 
 _exptl_crystal_face_index_k 
 _exptl_crystal_face_index_l 
 _exptl_crystal_face_perp_dist 
    0.00    0.00    1.00    0.0200 
    0.00    0.00   -1.00    0.0200 
    0.00   -1.00    0.00    0.1200 
   -1.00    1.00    1.00    0.0800 
    1.00    1.00   -1.00    0.0700 
_vrf_REFLT_03_p25rfas 
; 
PROBLEM: Alert A: > 15% excess reflns - sys abs data present? 
RESPONSE:  Two orientations from nonmerohedral twinning were collected and 
integrated from the data crystal.  Reflections with complete and no overlap 
from these orientations were combined.  Owing to this nonmerohedral twinning 
pseudo-equivalent reflections were not merged into one unique set. 
; 
 

#===END
 
data_pnmafac 
 
_audit_creation_method            SHELXL-97 
_chemical_name_systematic 
; 
 ? 
; 
_chemical_name_common             ? 
_chemical_melting_point           ? 
_chemical_formula_moiety          ? 
_chemical_formula_sum 
 'C9 H14 F6 Fe N4 P S' 
_chemical_formula_weight          411.12 
 
loop_ 
 _atom_type_symbol 
 _atom_type_description 
 _atom_type_scat_dispersion_real 
 _atom_type_scat_dispersion_imag 
 _atom_type_scat_source 
 'C'  'C'   0.0033   0.0016 
 'International Tables Vol C Tables 4.2.6.8 and 6.1.1.4' 
 'H'  'H'   0.0000   0.0000 
 'International Tables Vol C Tables 4.2.6.8 and 6.1.1.4' 
 'N'  'N'   0.0061   0.0033 
 'International Tables Vol C Tables 4.2.6.8 and 6.1.1.4' 
 'F'  'F'   0.0171   0.0103 
 'International Tables Vol C Tables 4.2.6.8 and 6.1.1.4' 
 'P'  'P'   0.1023   0.0942 
 'International Tables Vol C Tables 4.2.6.8 and 6.1.1.4' 
 'S'  'S'   0.1246   0.1234 
 'International Tables Vol C Tables 4.2.6.8 and 6.1.1.4' 
 'Fe'  'Fe'   0.3463   0.8444 
 'International Tables Vol C Tables 4.2.6.8 and 6.1.1.4' 
 
_symmetry_cell_setting            ? 
_symmetry_space_group_name_H-M    ? 
 
loop_ 
 _symmetry_equiv_pos_as_xyz 
 'x, y, z' 
 '-x+1/2, -y, z+1/2' 
 '-x, y+1/2, -z' 
 'x+1/2, -y+1/2, -z+1/2' 
 '-x, -y, -z' 
 'x-1/2, y, -z-1/2' 
 'x, -y-1/2, z' 
 '-x-1/2, y-1/2, z-1/2' 
 
_cell_length_a                    16.243(4) 
_cell_length_b                    20.985(5) 
_cell_length_c                    9.747(2) 
_cell_angle_alpha                 90.00 
_cell_angle_beta                  90.00 
_cell_angle_gamma                 90.00 
_cell_volume                      3322.4(13) 
_cell_formula_units_Z             8 
_cell_measurement_temperature     193(2) 
_cell_measurement_reflns_used     ? 
_cell_measurement_theta_min       ? 
_cell_measurement_theta_max       ? 
 
_exptl_crystal_description        ? 
_exptl_crystal_colour             ? 
_exptl_crystal_size_max           ? 
_exptl_crystal_size_mid           ? 
_exptl_crystal_size_min           ? 
_exptl_crystal_density_meas       ? 
_exptl_crystal_density_diffrn     1.644 
_exptl_crystal_density_method     'not measured' 
_exptl_crystal_F_000              1656 
_exptl_absorpt_coefficient_mu     1.187 
_exptl_absorpt_correction_type    ? 
_exptl_absorpt_correction_T_min   ? 
_exptl_absorpt_correction_T_max   ? 
_exptl_absorpt_process_details    ? 
 
_exptl_special_details 
; 
 ? 
; 
 
_diffrn_ambient_temperature       193(2) 
_diffrn_radiation_wavelength      0.71073 
_diffrn_radiation_type            MoK\a 
_diffrn_radiation_source          'fine-focus sealed tube' 
_diffrn_radiation_monochromator   graphite 
_diffrn_measurement_device_type   ? 
_diffrn_measurement_method        ? 
_diffrn_detector_area_resol_mean  ? 
_diffrn_standards_number          ? 
_diffrn_standards_interval_count  ? 
_diffrn_standards_interval_time   ? 
_diffrn_standards_decay_%         ? 
_diffrn_reflns_number             32660 
_diffrn_reflns_av_R_equivalents   0.0737 
_diffrn_reflns_av_sigmaI/netI     0.0401 
_diffrn_reflns_limit_h_min        -19 
_diffrn_reflns_limit_h_max        19 
_diffrn_reflns_limit_k_min        -25 
_diffrn_reflns_limit_k_max        25 
_diffrn_reflns_limit_l_min        -11 
_diffrn_reflns_limit_l_max        11 
_diffrn_reflns_theta_min          1.94 
_diffrn_reflns_theta_max          25.37 
_reflns_number_total              3131 
_reflns_number_gt                 2204 
_reflns_threshold_expression      >2sigma(I) 
 
_computing_data_collection        ? 
_computing_cell_refinement        ? 
_computing_data_reduction         ? 
_computing_structure_solution     'SHELXS-97 (Sheldrick, 1990)' 
_computing_structure_refinement   'SHELXL-97 (Sheldrick, 1997)' 
_computing_molecular_graphics     ? 
_computing_publication_material   ? 
 
_refine_special_details 
; 
 Refinement of F^2^ against ALL reflections.  The weighted R-factor wR and 
 goodness of fit S are based on F^2^, conventional R-factors R are based 
 on F, with F set to zero for negative F^2^. The threshold expression of 
 F^2^ > 2sigma(F^2^) is used only for calculating R-factors(gt) etc. and is 
 not relevant to the choice of reflections for refinement.  R-factors based 
 on F^2^ are statistically about twice as large as those based on F, and R- 
 factors based on ALL data will be even larger. 
; 
 
_refine_ls_structure_factor_coef  Fsqd  
_refine_ls_matrix_type            full 
_refine_ls_weighting_scheme       calc  
_refine_ls_weighting_details 
 'calc w=1/[\s^2^(Fo^2^)+(0.0647P)^2^+0.5853P] where P=(Fo^2^+2Fc^2^)/3' 
_atom_sites_solution_primary      direct 
_atom_sites_solution_secondary    difmap 
_atom_sites_solution_hydrogens    geom 
_refine_ls_hydrogen_treatment     mixed 
_refine_ls_extinction_method      none 
_refine_ls_extinction_coef        ? 
_refine_ls_number_reflns          3131 
_refine_ls_number_parameters      214 
_refine_ls_number_restraints      0 
_refine_ls_R_factor_all           0.0773 
_refine_ls_R_factor_gt            0.0460 
_refine_ls_wR_factor_ref          0.1167 
_refine_ls_wR_factor_gt           0.1066 
_refine_ls_goodness_of_fit_ref    1.031 
_refine_ls_restrained_S_all       1.031 
_refine_ls_shift/su_max           0.015 
_refine_ls_shift/su_mean          0.001 
 
loop_ 
 _atom_site_label 
 _atom_site_type_symbol 
 _atom_site_fract_x 
 _atom_site_fract_y 
 _atom_site_fract_z 
 _atom_site_U_iso_or_equiv 
 _atom_site_adp_type 
 _atom_site_occupancy 
 _atom_site_symmetry_multiplicity 
 _atom_site_calc_flag 
 _atom_site_refinement_flags 
 _atom_site_disorder_assembly 
 _atom_site_disorder_group 
Fe1 Fe 0.98018(3) 0.31196(2) 0.20072(5) 0.03445(18) Uani 1 1 d . . . 
C1 C 0.9467(2) 0.37665(17) 0.0851(4) 0.0383(8) Uani 1 1 d . . . 
N1 N 0.92717(17) 0.41752(14) 0.0133(3) 0.0418(7) Uani 1 1 d . . . 
C2 C 0.9049(2) 0.46984(18) -0.0747(4) 0.0540(10) Uani 1 1 d . . . 
H2A H 0.8919 0.5073 -0.0187 0.081 Uiso 1 1 calc R . . 
H2B H 0.8566 0.4581 -0.1294 0.081 Uiso 1 1 calc R . . 
H2C H 0.9509 0.4798 -0.1360 0.081 Uiso 1 1 calc R . . 
C3 C 1.0839(2) 0.34990(17) 0.2212(4) 0.0400(9) Uani 1 1 d . . . 
N2 N 1.14733(19) 0.37225(14) 0.2391(3) 0.0479(8) Uani 1 1 d . . . 
C4 C 1.2269(2) 0.3985(2) 0.2717(5) 0.0752(15) Uani 1 1 d . . . 
H4A H 1.2217 0.4280 0.3491 0.113 Uiso 1 1 calc R . . 
H4B H 1.2485 0.4214 0.1918 0.113 Uiso 1 1 calc R . . 
H4C H 1.2647 0.3639 0.2962 0.113 Uiso 1 1 calc R . . 
C5 C 0.9400(2) 0.35707(17) 0.3526(4) 0.0402(9) Uani 1 1 d . . . 
N3 N 0.91888(18) 0.38612(16) 0.4460(3) 0.0541(9) Uani 1 1 d . . . 
C6 C 0.8982(3) 0.4206(2) 0.5695(4) 0.0778(15) Uani 1 1 d . . . 
H6A H 0.8633 0.3939 0.6280 0.117 Uiso 1 1 calc R . . 
H6B H 0.8686 0.4597 0.5453 0.117 Uiso 1 1 calc R . . 
H6C H 0.9488 0.4316 0.6189 0.117 Uiso 1 1 calc R . . 
C7 C 1.0234(3) 0.2500 0.3506(6) 0.0437(13) Uani 1 2 d S . . 
N4 N 1.0545(3) 0.2500 0.4585(5) 0.0458(11) Uani 1 2 d S . . 
C8 C 1.0846(4) 0.2500 0.5942(6) 0.0595(16) Uani 1 2 d S . . 
H8A H 1.0459 0.2728 0.6537 0.089 Uiso 0.50 1 calc PR . . 
H8B H 1.1383 0.2713 0.5969 0.089 Uiso 0.50 1 calc PR . . 
H8C H 1.0905 0.2060 0.6263 0.089 Uiso 0.50 1 calc PR . . 
S1 S 1.02290(8) 0.2500 0.02621(13) 0.0421(3) Uani 1 2 d S . . 
S2 S 0.86619(7) 0.2500 0.17443(13) 0.0385(3) Uani 1 2 d S . . 
C9 C 0.9346(3) 0.2500 -0.0896(6) 0.0524(14) Uani 1 2 d S . . 
H9A H 0.9371 0.2881 -0.1492 0.063 Uiso 0.50 1 calc PR . . 
H9B H 0.9371 0.2119 -0.1492 0.063 Uiso 0.50 1 calc PR . . 
C10 C 0.8526(3) 0.2500 -0.0109(5) 0.0534(15) Uani 1 2 d S . . 
H10A H 0.8204 0.2119 -0.0376 0.064 Uiso 0.50 1 calc PR . . 
H10B H 0.8204 0.2881 -0.0376 0.064 Uiso 0.50 1 calc PR . . 
P1 P 0.84862(6) 0.57357(6) 0.29106(13) 0.0608(4) Uani 1 1 d . . . 
F6 F 0.90509(19) 0.61784(13) 0.2019(3) 0.0952(9) Uani 1 1 d . . . 
F5 F 0.79682(19) 0.55191(17) 0.1633(3) 0.1224(12) Uani 1 1 d . . . 
F4 F 0.89800(15) 0.59349(13) 0.4238(3) 0.0850(8) Uani 1 1 d . . . 
F3 F 0.90995(16) 0.51578(12) 0.2652(3) 0.0879(9) Uani 1 1 d . . . 
F2 F 0.79378(17) 0.52768(13) 0.3872(4) 0.1106(11) Uani 1 1 d . . . 
F1 F 0.78621(16) 0.63052(14) 0.3170(3) 0.1003(10) Uani 1 1 d . . . 
C11 C 0.8112(4) 0.2500 -0.4214(6) 0.0702(19) Uani 1 2 d S . . 
C12 C 0.7265(4) 0.2500 -0.4564(8) 0.110(3) Uani 1 2 d S . . 
H12A H 0.7059 0.2061 -0.4573 0.165 Uiso 0.50 1 calc PR . . 
H12B H 0.7193 0.2690 -0.5475 0.165 Uiso 0.50 1 calc PR . . 
H12C H 0.6957 0.2749 -0.3886 0.165 Uiso 0.50 1 calc PR . . 
N5 N 0.8772(4) 0.2500 -0.3952(6) 0.114(3) Uani 1 2 d S . . 
 
loop_ 
 _atom_site_aniso_label 
 _atom_site_aniso_U_11 
 _atom_site_aniso_U_22 
 _atom_site_aniso_U_33 
 _atom_site_aniso_U_23 
 _atom_site_aniso_U_13 
 _atom_site_aniso_U_12 
Fe1 0.0274(3) 0.0385(3) 0.0375(3) 0.0005(2) 0.0013(2) 0.0011(2) 
C1 0.0278(17) 0.041(2) 0.046(2) -0.0060(19) 0.0003(17) -0.0034(16) 
N1 0.0380(17) 0.0439(19) 0.0436(18) -0.0001(16) -0.0018(14) 0.0020(15) 
C2 0.055(2) 0.053(2) 0.054(3) 0.012(2) -0.007(2) 0.008(2) 
C3 0.036(2) 0.036(2) 0.048(2) 0.0035(17) 0.0034(17) 0.0043(17) 
N2 0.0305(17) 0.0431(19) 0.070(2) 0.0038(17) 0.0022(15) -0.0015(15) 
C4 0.033(2) 0.061(3) 0.131(4) -0.001(3) -0.006(2) -0.009(2) 
C5 0.0279(18) 0.048(2) 0.045(2) -0.0055(19) -0.0048(17) 0.0016(17) 
N3 0.0425(19) 0.065(2) 0.054(2) -0.0151(19) -0.0036(16) 0.0112(17) 
C6 0.067(3) 0.104(4) 0.063(3) -0.037(3) 0.005(2) 0.019(3) 
C7 0.029(3) 0.055(4) 0.047(3) 0.000 0.001(3) 0.000 
N4 0.035(2) 0.052(3) 0.050(3) 0.000 -0.006(2) 0.000 
C8 0.069(4) 0.057(4) 0.052(4) 0.000 -0.031(3) 0.000 
S1 0.0413(7) 0.0458(8) 0.0391(7) 0.000 0.0097(6) 0.000 
S2 0.0268(6) 0.0469(8) 0.0416(8) 0.000 -0.0013(5) 0.000 
C9 0.059(4) 0.057(4) 0.041(3) 0.000 -0.007(3) 0.000 
C10 0.048(3) 0.063(4) 0.049(3) 0.000 -0.018(3) 0.000 
P1 0.0392(6) 0.0547(7) 0.0886(9) -0.0208(7) 0.0005(6) -0.0018(5) 
F6 0.103(2) 0.081(2) 0.102(2) 0.0131(17) 0.0241(18) -0.0084(17) 
F5 0.094(2) 0.127(3) 0.147(3) -0.064(2) -0.059(2) 0.021(2) 
F4 0.0768(17) 0.0922(19) 0.0860(19) -0.0172(16) -0.0096(15) -0.0056(15) 
F3 0.0727(18) 0.0722(18) 0.119(2) -0.0179(17) 0.0097(17) 0.0204(14) 
F2 0.080(2) 0.089(2) 0.162(3) -0.011(2) 0.039(2) -0.0270(16) 
F1 0.0716(17) 0.0811(19) 0.148(3) -0.0410(18) -0.0089(18) 0.0315(15) 
C11 0.049(4) 0.112(6) 0.049(4) 0.000 0.000(3) 0.000 
C12 0.050(4) 0.163(8) 0.117(6) 0.000 -0.017(4) 0.000 
N5 0.052(4) 0.226(8) 0.063(4) 0.000 -0.009(3) 0.000 
 
_geom_special_details 
; 
 All esds (except the esd in the dihedral angle between two l.s. planes) 
 are estimated using the full covariance matrix.  The cell esds are taken 
 into account individually in the estimation of esds in distances, angles 
 and torsion angles; correlations between esds in cell parameters are only 
 used when they are defined by crystal symmetry.  An approximate (isotropic) 
 treatment of cell esds is used for estimating esds involving l.s. planes. 
; 
 
loop_ 
 _geom_bond_atom_site_label_1 
 _geom_bond_atom_site_label_2 
 _geom_bond_distance 
 _geom_bond_site_symmetry_2 
 _geom_bond_publ_flag 
Fe1 C1 1.846(4) . ? 
Fe1 C3 1.875(4) . ? 
Fe1 C5 1.875(4) . ? 
Fe1 C7 2.078(5) . ? 
Fe1 S1 2.2507(12) . ? 
Fe1 S2 2.2770(11) . ? 
Fe1 Fe1 2.6005(12) 7_565 ? 
C1 N1 1.152(4) . ? 
N1 C2 1.440(4) . ? 
C3 N2 1.145(4) . ? 
N2 C4 1.441(5) . ? 
C5 N3 1.148(4) . ? 
N3 C6 1.443(5) . ? 
C7 N4 1.167(6) . ? 
C7 Fe1 2.078(5) 7_565 ? 
N4 C8 1.410(7) . ? 
S1 C9 1.826(5) . ? 
S1 Fe1 2.2507(12) 7_565 ? 
S2 C10 1.820(5) . ? 
S2 Fe1 2.2770(11) 7_565 ? 
C9 C10 1.537(7) . ? 
P1 F6 1.568(3) . ? 
P1 F5 1.570(3) . ? 
P1 F4 1.579(3) . ? 
P1 F1 1.587(3) . ? 
P1 F3 1.590(3) . ? 
P1 F2 1.612(3) . ? 
C11 N5 1.101(7) . ? 
C11 C12 1.418(8) . ? 
 
loop_ 
 _geom_angle_atom_site_label_1 
 _geom_angle_atom_site_label_2 
 _geom_angle_atom_site_label_3 
 _geom_angle 
 _geom_angle_site_symmetry_1 
 _geom_angle_site_symmetry_3 
 _geom_angle_publ_flag 
C1 Fe1 C3 91.01(14) . . ? 
C1 Fe1 C5 90.47(16) . . ? 
C3 Fe1 C5 90.82(15) . . ? 
C1 Fe1 C7 171.40(15) . . ? 
C3 Fe1 C7 83.51(16) . . ? 
C5 Fe1 C7 83.00(17) . . ? 
C1 Fe1 S1 93.12(11) . . ? 
C3 Fe1 S1 92.79(11) . . ? 
C5 Fe1 S1 174.86(12) . . ? 
C7 Fe1 S1 93.77(12) . . ? 
C1 Fe1 S2 96.41(11) . . ? 
C3 Fe1 S2 170.26(11) . . ? 
C5 Fe1 S2 95.40(11) . . ? 
C7 Fe1 S2 89.80(12) . . ? 
S1 Fe1 S2 80.54(4) . . ? 
C1 Fe1 Fe1 137.34(11) . 7_565 ? 
C3 Fe1 Fe1 115.13(10) . 7_565 ? 
C5 Fe1 Fe1 120.33(11) . 7_565 ? 
C7 Fe1 Fe1 51.26(10) . 7_565 ? 
S1 Fe1 Fe1 54.71(2) . 7_565 ? 
S2 Fe1 Fe1 55.18(2) . 7_565 ? 
N1 C1 Fe1 178.8(3) . . ? 
C1 N1 C2 178.2(4) . . ? 
N2 C3 Fe1 177.3(3) . . ? 
C3 N2 C4 175.8(4) . . ? 
N3 C5 Fe1 176.8(3) . . ? 
C5 N3 C6 175.2(4) . . ? 
N4 C7 Fe1 141.26(10) . 7_565 ? 
N4 C7 Fe1 141.26(10) . . ? 
Fe1 C7 Fe1 77.5(2) 7_565 . ? 
C7 N4 C8 174.6(5) . . ? 
C9 S1 Fe1 103.01(15) . . ? 
C9 S1 Fe1 103.01(15) . 7_565 ? 
Fe1 S1 Fe1 70.58(5) . 7_565 ? 
C10 S2 Fe1 102.16(15) . . ? 
C10 S2 Fe1 102.16(15) . 7_565 ? 
Fe1 S2 Fe1 69.65(4) . 7_565 ? 
C10 C9 S1 111.8(4) . . ? 
C9 C10 S2 113.0(4) . . ? 
F6 P1 F5 92.6(2) . . ? 
F6 P1 F4 90.01(16) . . ? 
F5 P1 F4 177.4(2) . . ? 
F6 P1 F1 90.91(17) . . ? 
F5 P1 F1 90.13(17) . . ? 
F4 P1 F1 89.67(15) . . ? 
F6 P1 F3 89.85(16) . . ? 
F5 P1 F3 89.37(17) . . ? 
F4 P1 F3 90.80(15) . . ? 
F1 P1 F3 179.10(16) . . ? 
F6 P1 F2 177.56(19) . . ? 
F5 P1 F2 89.5(2) . . ? 
F4 P1 F2 87.84(17) . . ? 
F1 P1 F2 90.23(17) . . ? 
F3 P1 F2 89.02(16) . . ? 
N5 C11 C12 179.5(8) . . ? 
 
_diffrn_measured_fraction_theta_max    1.000 
_diffrn_reflns_theta_full              25.37 
_diffrn_measured_fraction_theta_full   1.000 
_refine_diff_density_max    0.457 
_refine_diff_density_min   -0.300 
_refine_diff_density_rms    0.070 

#===END
  
data_p21cabs 
  
_audit_creation_method            SHELXL-97 
_chemical_name_systematic 
; 
 ? 
; 
_chemical_name_common             ? 
_chemical_melting_point           ? 
_chemical_formula_moiety          ? 
_chemical_formula_sum 
 'C16 H20 F6 Fe N5 P S' 
_chemical_formula_weight          515.25 
  
loop_ 
 _atom_type_symbol 
 _atom_type_description 
 _atom_type_scat_dispersion_real 
 _atom_type_scat_dispersion_imag 
 _atom_type_scat_source 
 'C'  'C'   0.0033   0.0016 
 'International Tables Vol C Tables 4.2.6.8 and 6.1.1.4' 
 'H'  'H'   0.0000   0.0000 
 'International Tables Vol C Tables 4.2.6.8 and 6.1.1.4' 
 'N'  'N'   0.0061   0.0033 
 'International Tables Vol C Tables 4.2.6.8 and 6.1.1.4' 
 'F'  'F'   0.0171   0.0103 
 'International Tables Vol C Tables 4.2.6.8 and 6.1.1.4' 
 'P'  'P'   0.1023   0.0942 
 'International Tables Vol C Tables 4.2.6.8 and 6.1.1.4' 
 'S'  'S'   0.1246   0.1234 
 'International Tables Vol C Tables 4.2.6.8 and 6.1.1.4' 
 'Fe'  'Fe'   0.3463   0.8444 
 'International Tables Vol C Tables 4.2.6.8 and 6.1.1.4' 
  
_symmetry_cell_setting            Monoclinic 
_symmetry_space_group_name_H-M    P2(1)/c 
  
loop_ 
 _symmetry_equiv_pos_as_xyz 
 'x, y, z' 
 '-x, y+1/2, -z+1/2' 
 '-x, -y, -z' 
 'x, -y-1/2, z-1/2' 
  
_cell_length_a                    15.693(2) 
_cell_length_b                    8.5297(13) 
_cell_length_c                    16.626(3) 
_cell_angle_alpha                 90.00 
_cell_angle_beta                  99.717(3) 
_cell_angle_gamma                 90.00 
_cell_volume                      2193.5(6) 
_cell_formula_units_Z             4 
_cell_measurement_temperature     193(2) 
_cell_measurement_reflns_used     ? 
_cell_measurement_theta_min       ? 
_cell_measurement_theta_max       ? 
  
_exptl_crystal_description        columnar 
_exptl_crystal_colour             amber 
_exptl_crystal_size_max           ? 
_exptl_crystal_size_mid           ? 
_exptl_crystal_size_min           ? 
_exptl_crystal_density_meas       ? 
_exptl_crystal_density_diffrn     1.560 
_exptl_crystal_density_method     'not measured' 
_exptl_crystal_F_000              1048 
_exptl_absorpt_coefficient_mu     0.918 
_exptl_absorpt_correction_type    empirical 
_exptl_absorpt_correction_T_min   0.8387 
_exptl_absorpt_correction_T_max   0.9866 
_exptl_absorpt_process_details    ? 
  
_exptl_special_details 
; 
 ? 
; 
  
_diffrn_ambient_temperature       193(2) 
_diffrn_radiation_wavelength      0.71073 
_diffrn_radiation_type            MoK\a 
_diffrn_radiation_source          'fine-focus sealed tube' 
_diffrn_radiation_monochromator   graphite 
_diffrn_measurement_device_type   'Bruker P4' 
_diffrn_measurement_method        '\w scans' 
_diffrn_detector_area_resol_mean  ? 
_diffrn_standards_number          ? 
_diffrn_standards_interval_count  ? 
_diffrn_standards_interval_time   ? 
_diffrn_standards_decay_%         ? 
_diffrn_reflns_number             11683 
_diffrn_reflns_av_R_equivalents   0.0425 
_diffrn_reflns_av_sigmaI/netI     0.0520 
_diffrn_reflns_limit_h_min        -18 
_diffrn_reflns_limit_h_max        13 
_diffrn_reflns_limit_k_min        -10 
_diffrn_reflns_limit_k_max        10 
_diffrn_reflns_limit_l_min        -19 
_diffrn_reflns_limit_l_max        20 
_diffrn_reflns_theta_min          2.49 
_diffrn_reflns_theta_max          25.34 
_reflns_number_total              4004 
_reflns_number_gt                 2917 
_reflns_threshold_expression      >2sigma(I) 
  
_computing_data_collection        'Bruker XSCANS' 
_computing_cell_refinement        'Bruker XSCANS' 
_computing_data_reduction         'Bruker SHELXTL' 
_computing_structure_solution     'SHELXS-97 (Sheldrick, 1990)' 
_computing_structure_refinement   'SHELXL-97 (Sheldrick, 1997)' 
_computing_molecular_graphics     'Bruker SHELXTL' 
_computing_publication_material   'Bruker SHELXTL' 
  
_refine_special_details 
; 
 Refinement of F^2^ against ALL reflections.  The weighted R-factor wR and 
 goodness of fit S are based on F^2^, conventional R-factors R are based 
 on F, with F set to zero for negative F^2^. The threshold expression of 
 F^2^ > 2sigma(F^2^) is used only for calculating R-factors(gt) etc. and is 
 not relevant to the choice of reflections for refinement.  R-factors based 
 on F^2^ are statistically about twice as large as those based on F, and R- 
 factors based on ALL data will be even larger. 
; 
  
_refine_ls_structure_factor_coef  Fsqd 
_refine_ls_matrix_type            full 
_refine_ls_weighting_scheme       calc 
_refine_ls_weighting_details 
 'calc w=1/[\s^2^(Fo^2^)+(0.0527P)^2^+0.0000P] where P=(Fo^2^+2Fc^2^)/3' 
_atom_sites_solution_primary      direct 
_atom_sites_solution_secondary    difmap 
_atom_sites_solution_hydrogens    geom 
_refine_ls_hydrogen_treatment     mixed 
_refine_ls_extinction_method      none 
_refine_ls_extinction_coef        ? 
_refine_ls_number_reflns          4004 
_refine_ls_number_parameters      331 
_refine_ls_number_restraints      0 
_refine_ls_R_factor_all           0.0715 
_refine_ls_R_factor_gt            0.0425 
_refine_ls_wR_factor_ref          0.0961 
_refine_ls_wR_factor_gt           0.0879 
_refine_ls_goodness_of_fit_ref    0.988 
_refine_ls_restrained_S_all       0.988 
_refine_ls_shift/su_max           0.003 
_refine_ls_shift/su_mean          0.000 
  
loop_ 
 _atom_site_label 
 _atom_site_type_symbol 
 _atom_site_fract_x 
 _atom_site_fract_y 
 _atom_site_fract_z 
 _atom_site_U_iso_or_equiv 
 _atom_site_adp_type 
 _atom_site_occupancy 
 _atom_site_symmetry_multiplicity 
 _atom_site_calc_flag 
 _atom_site_refinement_flags 
 _atom_site_disorder_assembly 
 _atom_site_disorder_group 
Fe1 Fe 0.76248(3) 0.61588(5) 0.56534(2) 0.02393(13) Uani 1 1 d . . . 
C1 C 0.80449(19) 0.6007(3) 0.67810(18) 0.0286(7) Uani 1 1 d . . . 
N1 N 0.82692(16) 0.5925(3) 0.74698(14) 0.0340(6) Uani 1 1 d . . . 
C2 C 0.8568(2) 0.5833(4) 0.83347(17) 0.0540(10) Uani 1 1 d . . . 
H2A H 0.8982 0.4970 0.8452 0.081 Uiso 1 1 calc R . . 
H2B H 0.8075 0.5647 0.8614 0.081 Uiso 1 1 calc R . . 
H2C H 0.8850 0.6821 0.8527 0.081 Uiso 1 1 calc R . . 
C3 C 0.71825(19) 0.8164(4) 0.58322(16) 0.0282(7) Uani 1 1 d . . . 
N2 N 0.68943(17) 0.9357(3) 0.59550(15) 0.0359(6) Uani 1 1 d . . . 
C4 C 0.6470(2) 1.0818(4) 0.6062(2) 0.0491(9) Uani 1 1 d . . . 
H4A H 0.6516 1.1515 0.5602 0.074 Uiso 1 1 calc R . . 
H4B H 0.6747 1.1313 0.6572 0.074 Uiso 1 1 calc R . . 
H4C H 0.5859 1.0623 0.6084 0.074 Uiso 1 1 calc R . . 
C5 C 0.6581(2) 0.5240(3) 0.58068(16) 0.0284(7) Uani 1 1 d . . . 
N3 N 0.59387(16) 0.4683(3) 0.59017(14) 0.0327(6) Uani 1 1 d . . . 
C6 C 0.5121(2) 0.4028(4) 0.6015(2) 0.0420(8) Uani 1 1 d . . . 
H6A H 0.4707 0.4877 0.6044 0.063 Uiso 1 1 calc R . . 
H6B H 0.5199 0.3423 0.6523 0.063 Uiso 1 1 calc R . . 
H6C H 0.4902 0.3340 0.5554 0.063 Uiso 1 1 calc R . . 
C7 C 0.81161(18) 0.4185(3) 0.54851(16) 0.0253(7) Uani 1 1 d . . . 
N4 N 0.84164(16) 0.2991(3) 0.53923(14) 0.0313(6) Uani 1 1 d . . . 
C8 C 0.8781(2) 0.1491(4) 0.5257(2) 0.0483(9) Uani 1 1 d . . . 
H8A H 0.8930 0.0937 0.5778 0.072 Uiso 1 1 calc R . . 
H8B H 0.9303 0.1639 0.5015 0.072 Uiso 1 1 calc R . . 
H8C H 0.8359 0.0874 0.4885 0.072 Uiso 1 1 calc R . . 
C9 C 0.72110(18) 0.6360(3) 0.45175(17) 0.0266(7) Uani 1 1 d . . . 
N5 N 0.69532(16) 0.6496(3) 0.38377(14) 0.0303(6) Uani 1 1 d . . . 
S1 S 0.89112(5) 0.72898(9) 0.53603(4) 0.0322(2) Uani 1 1 d . . . 
C10 C 0.6613(2) 0.6647(4) 0.29814(16) 0.0422(9) Uani 1 1 d . . . 
H10A H 0.7092 0.6689 0.2672 0.063 Uiso 1 1 calc R . . 
H10B H 0.6271 0.7611 0.2888 0.063 Uiso 1 1 calc R . . 
H10C H 0.6245 0.5742 0.2801 0.063 Uiso 1 1 calc R . . 
C11 C 0.97523(19) 0.7048(3) 0.62077(17) 0.0291(7) Uani 1 1 d . . . 
C12 C 1.0447(2) 0.6053(4) 0.61576(18) 0.0393(8) Uani 1 1 d . . . 
H12 H 1.0443 0.5419 0.5687 0.047 Uiso 1 1 calc R . . 
C13 C 1.1143(2) 0.5986(4) 0.6794(2) 0.0529(10) Uani 1 1 d . . . 
H13 H 1.1622 0.5334 0.6747 0.063 Uiso 1 1 calc R . . 
C14 C 1.1147(2) 0.6853(5) 0.7492(2) 0.0535(10) Uani 1 1 d . . . 
H14 H 1.1624 0.6790 0.7926 0.064 Uiso 1 1 calc R . . 
C15 C 1.0465(2) 0.7802(4) 0.7560(2) 0.0486(9) Uani 1 1 d . . . 
H15 H 1.0462 0.8384 0.8046 0.058 Uiso 1 1 calc R . . 
C16 C 0.9774(2) 0.7921(4) 0.69222(19) 0.0376(8) Uani 1 1 d . . . 
H16 H 0.9309 0.8607 0.6972 0.045 Uiso 1 1 calc R . . 
P1 P 0.60736(7) 1.34870(11) -0.14550(6) 0.0503(3) Uani 1 1 d . . . 
F1 F 0.6581(6) 1.4733(8) -0.0890(3) 0.102(4) Uani 0.635(10) 1 d P A 1 
F2 F 0.5447(6) 1.3113(13) -0.0840(6) 0.141(5) Uani 0.635(10) 1 d P A 1 
F3 F 0.6617(6) 1.3933(16) -0.2099(6) 0.153(6) Uani 0.635(10) 1 d P A 1 
F4 F 0.5630(6) 1.2182(7) -0.2072(3) 0.083(2) Uani 0.635(10) 1 d P A 1 
F5 F 0.6693(7) 1.2248(10) -0.1047(7) 0.177(5) Uani 0.635(10) 1 d P A 1 
F6 F 0.5399(5) 1.4697(8) -0.1885(4) 0.109(3) Uani 0.635(10) 1 d P A 1 
F7 F 0.5799(9) 1.5013(12) -0.0919(7) 0.125(5) Uani 0.365(10) 1 d P A 2 
F8 F 0.6950(10) 1.388(3) -0.0956(10) 0.167(8) Uani 0.365(10) 1 d P A 2 
F9 F 0.6339(17) 1.440(2) -0.2171(8) 0.167(12) Uani 0.365(10) 1 d P A 2 
F10 F 0.5155(7) 1.323(3) -0.1876(7) 0.165(8) Uani 0.365(10) 1 d P A 2 
F11 F 0.5937(15) 1.2440(15) -0.0746(6) 0.118(8) Uani 0.365(10) 1 d P A 2 
F12 F 0.6404(18) 1.2048(15) -0.1818(12) 0.189(10) Uani 0.365(10) 1 d P A 2 
  
loop_ 
 _atom_site_aniso_label 
 _atom_site_aniso_U_11 
 _atom_site_aniso_U_22 
 _atom_site_aniso_U_33 
 _atom_site_aniso_U_23 
 _atom_site_aniso_U_13 
 _atom_site_aniso_U_12 
Fe1 0.0256(2) 0.0258(2) 0.0205(2) 0.00101(18) 0.00406(16) 0.00294(18) 
C1 0.0311(17) 0.0252(16) 0.0309(17) -0.0019(13) 0.0089(14) 0.0033(13) 
N1 0.0384(16) 0.0407(16) 0.0233(13) 0.0023(12) 0.0065(12) 0.0049(12) 
C2 0.060(3) 0.078(3) 0.0212(16) 0.0018(17) 0.0007(16) 0.014(2) 
C3 0.0307(18) 0.0312(17) 0.0235(15) 0.0029(13) 0.0068(13) 0.0019(14) 
N2 0.0422(17) 0.0354(16) 0.0316(14) 0.0046(12) 0.0107(12) 0.0060(13) 
C4 0.063(3) 0.0335(19) 0.053(2) -0.0006(17) 0.0158(19) 0.0169(17) 
C5 0.0331(19) 0.0277(16) 0.0229(15) 0.0019(13) 0.0006(14) 0.0081(14) 
N3 0.0302(16) 0.0372(15) 0.0309(14) 0.0030(12) 0.0057(12) 0.0025(13) 
C6 0.0276(18) 0.048(2) 0.053(2) 0.0090(17) 0.0135(16) -0.0050(15) 
C7 0.0266(17) 0.0288(17) 0.0205(14) 0.0009(12) 0.0043(12) -0.0053(13) 
N4 0.0395(16) 0.0260(14) 0.0294(13) -0.0019(12) 0.0084(12) -0.0006(12) 
C8 0.069(3) 0.0284(19) 0.051(2) -0.0034(16) 0.0206(19) 0.0109(17) 
C9 0.0256(16) 0.0263(16) 0.0294(16) -0.0012(13) 0.0088(13) 0.0003(13) 
N5 0.0314(15) 0.0344(15) 0.0247(13) 0.0017(11) 0.0039(11) -0.0028(11) 
S1 0.0331(5) 0.0356(4) 0.0276(4) 0.0044(3) 0.0046(3) -0.0012(3) 
C10 0.045(2) 0.058(2) 0.0219(16) 0.0073(15) 0.0013(15) -0.0050(17) 
C11 0.0295(17) 0.0290(16) 0.0293(16) 0.0020(13) 0.0062(13) -0.0035(13) 
C12 0.038(2) 0.047(2) 0.0355(17) 0.0022(16) 0.0122(15) 0.0028(16) 
C13 0.036(2) 0.063(3) 0.060(2) 0.013(2) 0.0097(18) 0.0126(18) 
C14 0.039(2) 0.074(3) 0.044(2) 0.013(2) -0.0036(18) -0.006(2) 
C15 0.050(2) 0.059(2) 0.0351(19) -0.0079(17) 0.0026(17) -0.017(2) 
C16 0.039(2) 0.0343(18) 0.0400(18) -0.0058(15) 0.0073(15) -0.0049(15) 
P1 0.0581(7) 0.0447(6) 0.0429(5) 0.0071(4) -0.0062(5) -0.0110(5) 
F1 0.177(10) 0.075(4) 0.051(3) -0.019(3) 0.011(4) -0.073(5) 
F2 0.149(7) 0.172(10) 0.124(7) -0.018(6) 0.084(6) -0.064(6) 
F3 0.097(5) 0.276(15) 0.101(7) -0.006(7) 0.060(5) -0.074(6) 
F4 0.135(6) 0.051(3) 0.062(3) -0.010(2) 0.009(4) -0.021(3) 
F5 0.197(10) 0.116(6) 0.172(9) 0.029(7) -0.103(8) 0.055(7) 
F6 0.089(5) 0.079(4) 0.147(6) -0.001(4) -0.016(4) 0.032(3) 
F7 0.119(10) 0.101(8) 0.164(12) -0.024(6) 0.054(9) 0.033(7) 
F8 0.080(9) 0.23(2) 0.180(13) -0.089(13) 0.003(8) -0.072(11) 
F9 0.33(3) 0.112(9) 0.041(6) 0.038(6) -0.022(10) -0.141(14) 
F10 0.060(7) 0.30(3) 0.119(10) 0.000(13) -0.044(6) -0.059(11) 
F11 0.25(2) 0.064(8) 0.029(4) 0.009(5) -0.006(9) -0.097(11) 
F12 0.32(3) 0.089(9) 0.195(19) -0.028(11) 0.15(2) 0.067(15) 
  
_geom_special_details 
; 
 All esds (except the esd in the dihedral angle between two l.s. planes) 
 are estimated using the full covariance matrix.  The cell esds are taken 
 into account individually in the estimation of esds in distances, angles 
 and torsion angles; correlations between esds in cell parameters are only 
 used when they are defined by crystal symmetry.  An approximate (isotropic) 
 treatment of cell esds is used for estimating esds involving l.s. planes. 
; 
  
loop_ 
 _geom_bond_atom_site_label_1 
 _geom_bond_atom_site_label_2 
 _geom_bond_distance 
 _geom_bond_site_symmetry_2 
 _geom_bond_publ_flag 
Fe1 C5 1.872(3) . ? 
Fe1 C1 1.884(3) . ? 
Fe1 C3 1.888(3) . ? 
Fe1 C7 1.892(3) . ? 
Fe1 C9 1.898(3) . ? 
Fe1 S1 2.3613(9) . ? 
C1 N1 1.142(3) . ? 
N1 C2 1.437(4) . ? 
C3 N2 1.146(3) . ? 
N2 C4 1.438(4) . ? 
C5 N3 1.149(4) . ? 
N3 C6 1.440(4) . ? 
C7 N4 1.144(3) . ? 
N4 C8 1.434(4) . ? 
C9 N5 1.140(3) . ? 
N5 C10 1.439(3) . ? 
S1 C11 1.773(3) . ? 
C11 C12 1.395(4) . ? 
C11 C16 1.397(4) . ? 
C12 C13 1.387(4) . ? 
C13 C14 1.376(5) . ? 
C14 C15 1.361(5) . ? 
C15 C16 1.386(4) . ? 
P1 F12 1.498(9) . ? 
P1 F10 1.508(8) . ? 
P1 F5 1.516(6) . ? 
P1 F8 1.518(13) . ? 
P1 F11 1.523(9) . ? 
P1 F3 1.526(7) . ? 
P1 F9 1.539(12) . ? 
P1 F1 1.547(5) . ? 
P1 F6 1.563(4) . ? 
P1 F2 1.566(8) . ? 
P1 F4 1.593(5) . ? 
P1 F7 1.674(9) . ? 
  
loop_ 
 _geom_angle_atom_site_label_1 
 _geom_angle_atom_site_label_2 
 _geom_angle_atom_site_label_3 
 _geom_angle 
 _geom_angle_site_symmetry_1 
 _geom_angle_site_symmetry_3 
 _geom_angle_publ_flag 
C5 Fe1 C1 90.17(12) . . ? 
C5 Fe1 C3 90.26(12) . . ? 
C1 Fe1 C3 88.97(12) . . ? 
C5 Fe1 C7 92.02(12) . . ? 
C1 Fe1 C7 90.17(11) . . ? 
C3 Fe1 C7 177.56(13) . . ? 
C5 Fe1 C9 90.75(12) . . ? 
C1 Fe1 C9 178.69(13) . . ? 
C3 Fe1 C9 90.09(12) . . ? 
C7 Fe1 C9 90.73(11) . . ? 
C5 Fe1 S1 175.97(8) . . ? 
C1 Fe1 S1 93.77(9) . . ? 
C3 Fe1 S1 90.70(9) . . ? 
C7 Fe1 S1 87.08(9) . . ? 
C9 Fe1 S1 85.33(9) . . ? 
N1 C1 Fe1 177.5(3) . . ? 
C1 N1 C2 178.9(3) . . ? 
N2 C3 Fe1 177.7(3) . . ? 
C3 N2 C4 175.3(3) . . ? 
N3 C5 Fe1 179.6(3) . . ? 
C5 N3 C6 178.3(3) . . ? 
N4 C7 Fe1 179.3(3) . . ? 
C7 N4 C8 178.6(3) . . ? 
N5 C9 Fe1 179.0(3) . . ? 
C9 N5 C10 178.8(3) . . ? 
C11 S1 Fe1 109.66(10) . . ? 
C12 C11 C16 117.9(3) . . ? 
C12 C11 S1 120.5(2) . . ? 
C16 C11 S1 121.5(2) . . ? 
C13 C12 C11 120.1(3) . . ? 
C14 C13 C12 120.8(3) . . ? 
C15 C14 C13 119.9(3) . . ? 
C14 C15 C16 120.3(3) . . ? 
C15 C16 C11 121.0(3) . . ? 
F12 P1 F10 93.6(10) . . ? 
F12 P1 F5 50.9(8) . . ? 
F10 P1 F5 126.7(11) . . ? 
F12 P1 F8 93.2(14) . . ? 
F10 P1 F8 172.7(12) . . ? 
F5 P1 F8 57.0(8) . . ? 
F12 P1 F11 86.3(9) . . ? 
F10 P1 F11 91.5(9) . . ? 
F5 P1 F11 53.7(7) . . ? 
F8 P1 F11 86.4(10) . . ? 
F12 P1 F3 69.5(7) . . ? 
F10 P1 F3 108.3(6) . . ? 
F5 P1 F3 95.5(8) . . ? 
F8 P1 F3 76.5(7) . . ? 
F11 P1 F3 149.1(11) . . ? 
F12 P1 F9 87.0(10) . . ? 
F10 P1 F9 94.4(9) . . ? 
F5 P1 F9 117.6(12) . . ? 
F8 P1 F9 88.4(11) . . ? 
F11 P1 F9 171.3(14) . . ? 
F3 P1 F9 22.2(11) . . ? 
F12 P1 F1 129.0(12) . . ? 
F10 P1 F1 137.3(11) . . ? 
F5 P1 F1 89.0(4) . . ? 
F8 P1 F1 36.1(7) . . ? 
F11 P1 F1 93.3(4) . . ? 
F3 P1 F1 87.9(5) . . ? 
F9 P1 F1 86.6(6) . . ? 
F12 P1 F6 127.6(10) . . ? 
F10 P1 F6 50.4(8) . . ? 
F5 P1 F6 177.1(5) . . ? 
F8 P1 F6 126.0(10) . . ? 
F11 P1 F6 124.7(10) . . ? 
F3 P1 F6 86.0(5) . . ? 
F9 P1 F6 64.0(9) . . ? 
F1 P1 F6 93.6(4) . . ? 
F12 P1 F2 113.2(8) . . ? 
F10 P1 F2 67.5(6) . . ? 
F5 P1 F2 89.5(5) . . ? 
F8 P1 F2 107.4(7) . . ? 
F11 P1 F2 35.8(8) . . ? 
F3 P1 F2 174.9(6) . . ? 
F9 P1 F2 152.9(12) . . ? 
F1 P1 F2 93.4(4) . . ? 
F6 P1 F2 89.0(5) . . ? 
F12 P1 F4 46.5(9) . . ? 
F10 P1 F4 47.2(8) . . ? 
F5 P1 F4 88.8(4) . . ? 
F8 P1 F4 139.6(9) . . ? 
F11 P1 F4 89.2(4) . . ? 
F3 P1 F4 87.6(5) . . ? 
F9 P1 F4 90.2(6) . . ? 
F1 P1 F4 174.7(5) . . ? 
F6 P1 F4 88.7(3) . . ? 
F2 P1 F4 91.4(4) . . ? 
F12 P1 F7 171.4(10) . . ? 
F10 P1 F7 92.7(11) . . ? 
F5 P1 F7 120.5(6) . . ? 
F8 P1 F7 80.2(7) . . ? 
F11 P1 F7 87.8(7) . . ? 
F3 P1 F7 113.8(7) . . ? 
F9 P1 F7 98.3(9) . . ? 
F1 P1 F7 45.2(4) . . ? 
F6 P1 F7 60.9(4) . . ? 
F2 P1 F7 64.2(5) . . ? 
F4 P1 F7 139.7(6) . . ? 
  
_diffrn_measured_fraction_theta_max    0.999 
_diffrn_reflns_theta_full              25.34 
_diffrn_measured_fraction_theta_full   0.999 
_refine_diff_density_max    0.465 
_refine_diff_density_min   -0.275 
_refine_diff_density_rms    0.060 
  
#===END
